# Supplementary material for: Molecular Analysis of Genetic Diversity and Structure of the Lablab (Lablab purpureus (L.) Sweet) Gene Pool Reveals Two Independent Routes of Domestication
Source: MDPI journal article supplement (doi:10.3390/plants12010057), 2022-12-22
Supplement: s1 [file s1]

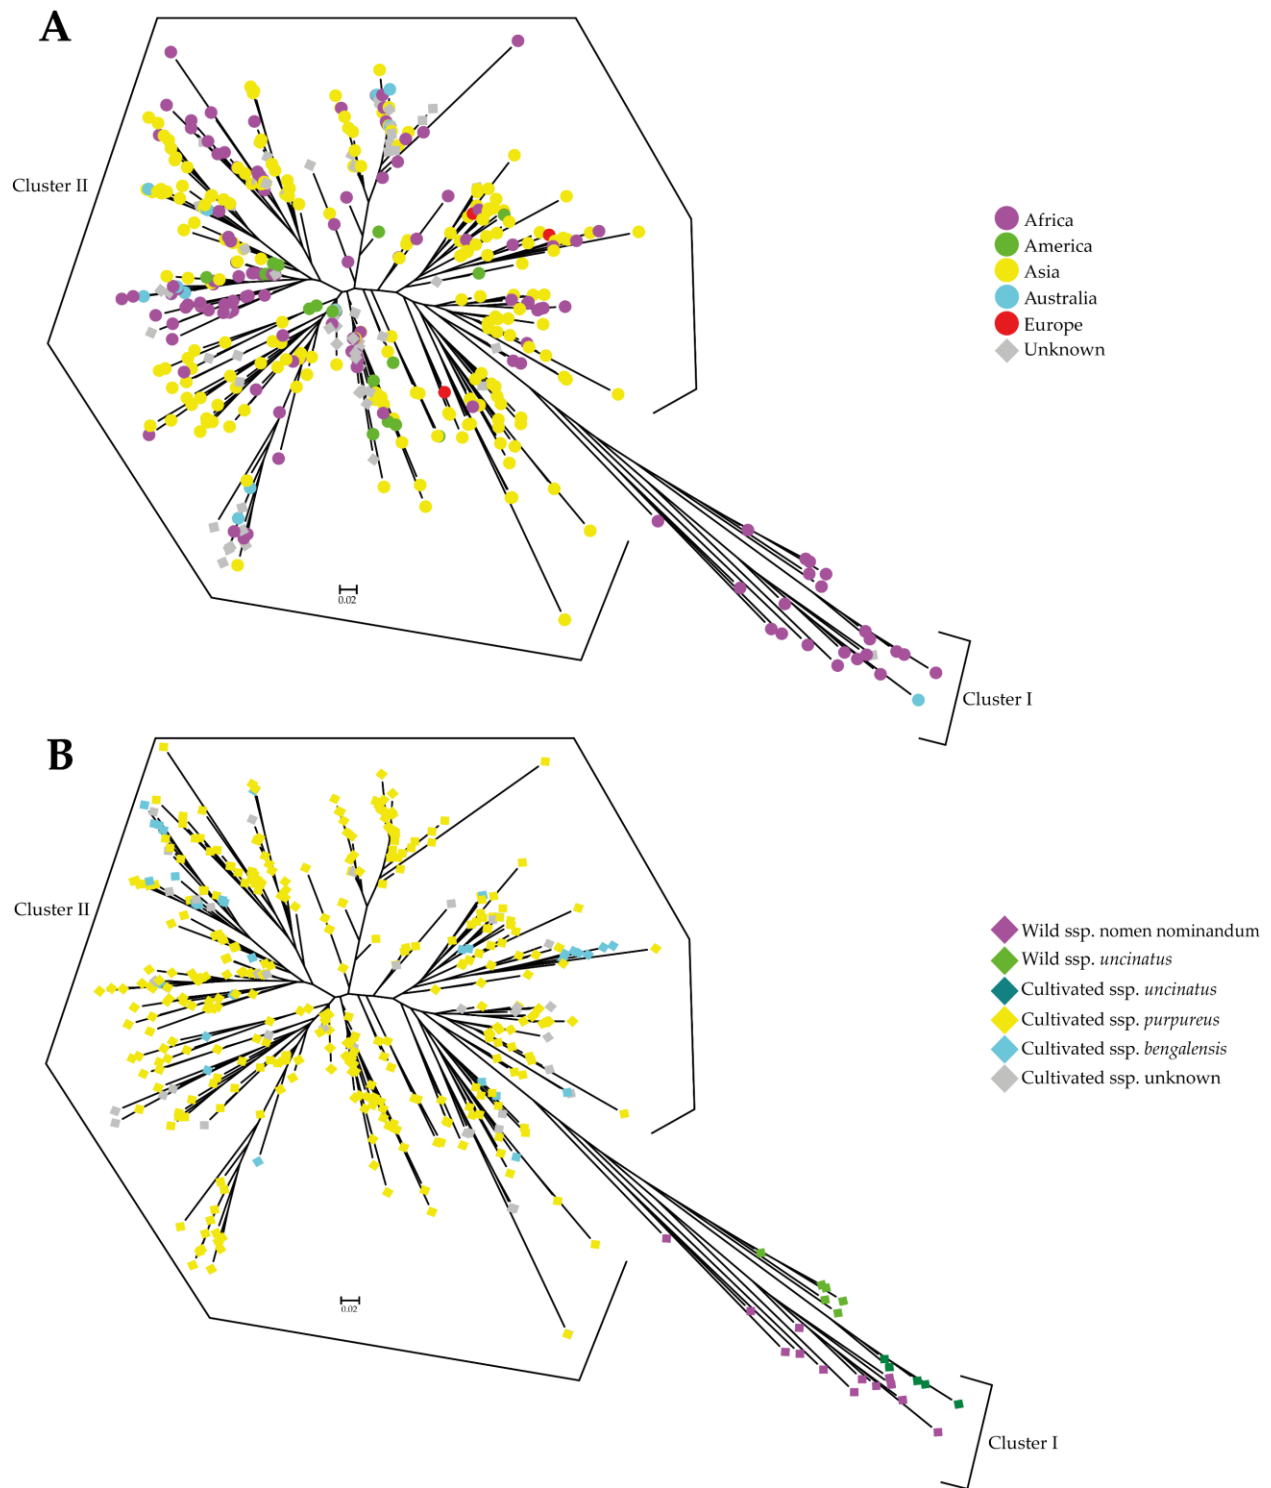

**Figure S1.** Neighbor-joining tree of 493 lablab accessions based on  $D_A$  genetic distances [40]. The distance was calculated from 15 nuclear SSR markers. (A) The accessions are presented based on their geographical origins. (B) The accessions are presented based on taxonomical classification.
