# Supplementary material for: Molecular Analysis of Genetic Diversity and Structure of the Lablab (Lablab purpureus (L.) Sweet) Gene Pool Reveals Two Independent Routes of Domestication
Source: Plants (Basel). 2022 Dec 22;12(1):57. doi: 10.3390/plants12010057 (PMC9824144; doi:10.3390/plants12010057)
Supplement: Supplementary file 1 [file plants-12-00057-s001.zip › Table S1.xlsx]

## Sheet: Supplementary Table S1
Table S1. A list of 493 lablab accessions used in this study. Details of morphological traits, cluster (UPGMA and STRUCTURE) membership, and haplotype group of the 493 accession are also provided.
	PlantNo	Name	Other name(s)							Other	Source	Status (cultivated/wild)	Taxonomy	Origin	Region	Subregion	No. of DAF	Fresh pod color	Dry pod color	Stem color	Leaf color	Flower color	Pod shape	Fresh pod length (cm)	Fresh pod width (cm)	Dry pod length (cm)	Dry pod width (cm)	Seed length (mm)	Seed width (mm)	Seed thickness (mm)	Number of seeds per pod	STRUCTURE	UPGMA	Haplotype group
			APG	AVRDC	CSIRO (CPI)	CIAT	IITA	ILRI	USDA PI																							Sub-population	Cluster
0	1	NI 6									Meise Botanic Garden	cultivated	Lablab purpureus subsp. purpureus	Pakistan	Asia	South	69	green	brown	green	green	white	flat and long	5.8	2	6.08	2	11.66	8.4475	5.4875	3.4	II	IV	A
2	2	NI 35									Meise Botanic Garden	cultivated	Lablab purpureus subsp. purpureus	Congo	Africa	Central	106	green	brown	green	green	purple	flat and long	5.6	2.16	4.78	1.96	11.212	7.834	5.398	3.2	II	IV	A
3	3	NI 73									Meise Botanic Garden	cultivated	Lablab purpureus subsp. purpureus	unknown	unknown	unknown	103	green	brown	green	green	white	flat and long	3.56667	1.52	4.35	1.525	10.6533	7.99	5.21333	3.25	II	IV	A
4	4	NI 75									Meise Botanic Garden	cultivated	Lablab purpureus subsp. purpureus	Brazil	America	South	138	green	brown	green	green	Not available	flat and long	4.9	2	5.55	2.15	11.04	7.915	4.245	2.5	II	IV	A
5	7	NI 91									Meise Botanic Garden	cultivated	Lablab purpureus subsp. purpureus	unknown	unknown	unknown	70	green	brown	green	green	white	flat and long	5.18	2.04	5.14	1.88	9.758	7.158	3.822	4	II	IV	A
6	8	NI 149									Meise Botanic Garden	cultivated	Lablab purpureus subsp. purpureus	unknown	unknown	unknown	67	green	brown	green	green	purple	flat and long	5.04	2.48	4.98	2.32	10.47	6.73	4.6	4	II	IV	A
9	13	NI 746									Meise Botanic Garden	cultivated	Lablab purpureus subsp. purpureus	Colombia	America	South	120	green	brown	green	green	white	flat and long	4.74	1.425	4.68	1.52	9.082	6.996	4.942	3.6	II	IV	A
10	14	NI 1464									Meise Botanic Garden	cultivated	Lablab purpureus subsp. bengalensis	unknown	unknown	unknown	-	-	-	green	green	purple	Not available	10.5	0.9	Not available	Not available	Not available	Not available	Not available	Not available	II	IV	A
11	20	PI 666231			30701	22676		21042	666231	Pegyi	USDA	cultivated	Lablab purpureus subsp. purpureus	Myanmar	Asia	Southeast	84	green	brown	green	green	white	flat and long	6.24	2.26	7.2	2	10.952	8.162	4.65	4	II	IV	A
12	23	PI 666247							666247	AusTRCF 319913, ATF 827, Grif 16553 USA126	USDA	cultivated	Lablab purpureus subsp. purpureus	Myanmar	Asia	Southeast	-	-	-	green	green	Not available	Not available	Not available	Not available	Not available	Not available	Not available	Not available	Not available	Not available	II	IV	A
13	26	JP 31126								WASE AKABANA	NARO	cultivated	Lablab purpureus subsp. purpureus	Japan	Asia	East	61	green	brown	purple	green	purple	flat and long	5.62	1.72	4.56	1.3	9.996	7.298	4.78	4	II	IV	A
14	28	JP 31128								SHIROHANA FUJIMAME	NARO	cultivated	Lablab purpureus subsp. purpureus	Japan	Asia	East	129	green	brown	purple	green	purple	flat and long	6.5	2.06	6.7	2.06	11.188	7.692	4.282	3.5	II	IV	A
15	29	JP 31129								BASHONARI FUJIMAME	NARO	cultivated	Lablab purpureus subsp. purpureus	Japan	Asia	East	56	green	brown	green	green	purple	flat and long	6.32	1.88	3.76	1.3	11.162	7.988	5.95	3.4	II	IV	A
16	33	JP 31134								SHIROHANA	NARO	cultivated	Lablab purpureus subsp. purpureus	Japan	Asia	East	74	green	brown	green	green	white	flat and long	5.025	2.1	4.12	1.68	11.138	8.746	5.53	2.6	II	IV	A
17	34	JP 222469								COL/PNG/2004/MAFF/2004PNG-14	NARO	cultivated	Lablab purpureus subsp. bengalensis	Papua New Guinea	Australia	Australia	74	green	brown	purple	green	purple	round and long	7.08	1.66	6.24	1.42	9.714	7.41	5.56	4.4	II	IV	A
18	38	JP 78164								COL/ISHIGAKI/1977/TARC/5643	NARO	cultivated	Lablab purpureus subsp. purpureus	Japan	Asia	East	46	green	brown	green	green	white	flat and long	5.52	2.06	4.76	1.62	11.246	8.032	5.858	3.6	II	IV	A
19	41	JP 247232								COL/CAMBODIA/2012/NIAS/CED2012C-17	NARO	cultivated	Lablab purpureus subsp. purpureus	Cambodia	Asia	Southeast	107	green	brown	green	green	white	flat and long	5.54	1.74	6.04	1.78	10.452	7.556	5.308	4.4	II	IV	A
20	44	2009 TN 5										cultivated	Lablab purpureus subsp. purpureus	India	Asia	South	101	green	brown	green	green	white	flat and long	9.88	2.02	9.96	1.84	9.53	6.8	3.5	4.6	II	IV	A
21	45	2009 TN 6										cultivated	Lablab purpureus subsp. purpureus	India	Asia	South	72	green with purple outer	brown	purple	green	purple	flat and long	7.74	1.86	10	2.06	11.328	9.078	5.85	5	II	IV	A
22	46	2009 TN 14										cultivated	Lablab purpureus subsp. purpureus	India	Asia	South	77	green with purple outer	brown	purple	green	purple	flat and long	8.96	1.7	9.46	1.58	10.966	9.122	5.92	4.4	II	IV	A
23	54	2009 TN 53										cultivated	Lablab purpureus subsp. purpureus	India	Asia	South	119	green	brown	green	green	white	flat and long	5.24	2.04	5.1	1.88	10.406	7.99	5.326	3.6	III	IV	A
24	55	2009 TN 54										cultivated	Lablab purpureus subsp. purpureus	India	Asia	South	114	green	brown	green	green	purple	flat and long	5.38	1.5	5.06	1.48	9.178	7.494	5.396	4	III	IV	A
25	56	2009 TN 55										cultivated	Lablab purpureus subsp. purpureus	India	Asia	South	83	green	brown	green	green	white	flat and long	6.86	1.78	6.64	1.96	11.5	8.714	5.956	3	II	IV	A
26	57	2009 TN 79										cultivated	Lablab purpureus subsp. purpureus	India	Asia	South	116	green	brown	green	green	white	flat and long	4.76	2.12	4.88	2.08	11.492	7.824	4.74	3	III	IV	A
28	60	2009 TN 104										cultivated	Lablab purpureus subsp. purpureus	India	Asia	South	113	green	brown	green	green	white	flat and long	4.9	2.12	4.66	1.96	11.184	8.294	5.644	3	III	IV	A
29	61	2009 TN 106										cultivated	Lablab purpureus subsp. purpureus	India	Asia	South	114	green	brown	green	green	white	flat and long	4.88	2.16	5.1	1.96	10.912	7.874	5.392	3.6	III	IV	A
30	62	2009 TN 107										cultivated	Lablab purpureus subsp. purpureus	India	Asia	South	118	green	brown	green	green	white	flat and long	5.46	2.08	5.3	1.9	11.068	8.216	4.658	3.4	III	IV	A
31	63	2009 TN 108										cultivated	Lablab purpureus subsp. purpureus	India	Asia	South	104	green	brown	green	green	purple	flat and long	5.32	2.22	4.92	1.94	10.572	7.23	4.71	4	III	IV	A
32	64	2009 TN 118										cultivated	Lablab purpureus subsp. purpureus	India	Asia	South	102	green	brown	green	green	white	flat and long	4.9	1.98	5.2	1.94	10.004	7.366	5.314	3.4	III	IV	A
33	65	2009 TN 130										cultivated	Lablab purpureus subsp. purpureus	India	Asia	South	103	green	brown	green	green	white	flat and long	5.22	2.14	5.64	1.96	10.6	7.27	5.126	4	II	IV	A
34	66	2008 TN 2										cultivated	Lablab purpureus subsp. purpureus	India	Asia	South	109	green	brown	green	green	purple	flat and long	5.62	1.76	5.08	1.56	10.184	7.816	5.454	3.2	III	IV	A
35	68	2008 TN 16										cultivated	Lablab purpureus subsp. purpureus	India	Asia	South	126	green	brown	green	green	purple	flat and long	4.86	1.8	4.54	1.88	8.496	5.872	2.832	2.8	II	IV	A
36	73	APG 50407			52546					IBS 880, AusTRCF 52546	APG	cultivated	Lablab purpureus subsp. purpureus	India	Asia	South	127	green	brown	green	green	Not available	flat and long	4.92	1.98	4.98	1.84	10.646	7.364	5.344	3.8	II	IV	A
37	74	APG 50402			52541					IBS 869, AusTRCF 52541	APG	cultivated	Lablab purpureus subsp. purpureus	India	Asia	South	97	green with purple outer	brown	purple	green	purple	flat and long	5.3	2.18	5.5	2.06	12.378	9.098	6.842	4.2	II	IV	A
39	79	APG 50472								021J, AusTRCF 309497	APG	cultivated	Lablab purpureus subsp. purpureus	Malawi	Africa	East	96	light green	brown	green	green	purple	flat and long	8.22	3.16	9.08	2.52	12.114	8.39	5.382	5	II	IV	A
40	80	APG 50435			81364					IBS 609, AusTRCF 81364	APG	cultivated	Lablab purpureus subsp. purpureus	unknown	unknown	unknown	75	green	brown	green	green	Not available	flat and long	3.76	1.68	3.55	1.6	9.438	7.014	4.404	2.25	III	IV	A
41	81	APG 50415			52555					IBS 874, AusTRCF 52555	APG	cultivated	Lablab purpureus subsp. purpureus	India	Asia	South	79	green	brown	green	green	white	flat and long	4.6	1.85	4	1.5	Not available	Not available	Not available	2.33333	II	IV	A
42	82	APG 50393			52532					IBS 864, AusTRCF 52532	APG	cultivated	Lablab purpureus subsp. purpureus	India	Asia	South	94	green	brown	green	green	white	flat and long	5.12	2.18	4.75	1.9	10.412	7.008	4.378	3.25	II	IV	A
43	83	APG 50399			52538					IBS 886, AusTRCF 52538	APG	cultivated	Lablab purpureus subsp. purpureus	India	Asia	South	120	green	brown	green	green	white	flat and long	7.4	1.5	7.8	1.6	9.534	8.484	5.144	4.2	II	IV	A
44	84	APG 50392			52531					IBS 862, AusTRCF 52531	APG	cultivated	Lablab purpureus subsp. purpureus	India	Asia	South	68	green	brown	green	green	white	flat and long	4.84	2.16	5.02	1.98	11.618	7.43	3.984	3.4	II	IV	A
45	86	APG 50477								048W, M/78/272, AusTRCF 309501	APG	cultivated	Lablab purpureus (L.) Sweet	South Africa	Africa	South	-	-	-	green	green	Not available	Not available	Not available	Not available	Not available	Not available	Not available	Not available	Not available	Not available	II	IV	A
48	89	APG 50450			106494					IBS 3773, AusTRCF 106494	APG	cultivated	Lablab purpureus subsp. purpureus	India	Asia	South	89	green	brown	green	green	purple	flat and long	7.66	1.6	8.68	1.7	8.07	6.662	3.41	4.6	II	IV	A
49	90	APG 50443			103821	22725		24744		AusTRCF 103821	APG	cultivated	Lablab purpureus subsp. purpureus	Sudan	Africa	East	92	green	brown	green	green	white	flat and long	4.58	1.96	5.02	1.92	10.98	7.474	4.668	3	II	IV	A
50	91	APG 50426			60795	22716		24797		AusTRCF 60795	APG	cultivated	Lablab purpureus subsp. purpureus	India	Asia	South	68	green	brown	green	green	purple	flat and long	4.38	1.98	4.66	1.86	9.48	6.538	3.86	4	II	IV	A
51	92	APG 50396			52535					IBS 884, AusTRCF 52535	APG	cultivated	Lablab purpureus subsp. purpureus	India	Asia	South	61	green	brown	green	green	white	flat and long	5.28	2.04	4.84	1.98	11.93	7.866	4.316	3	II	IV	A
52	93	APG 50431			76995					MM 519, AusTRCF 76995	APG	cultivated	Lablab purpureus subsp. purpureus	Zambia	Africa	South	-	-	-	green	green	Not available	Not available	Not available	Not available	Not available	Not available	Not available	Not available	Not available	Not available	II	IV	A
53	94	APG 50416			52556					IBS 876, AusTRCF 52556	APG	cultivated	Lablab purpureus subsp. purpureus	India	Asia	South	79	green	brown	green	green	white	flat and long	7.86	2.14	6.76	1.82	12.42	9.618	7.266	3.4	II	IV	A
54	95	APG 50405			52544					IBS 867, AusTRCF 52544	APG	cultivated	Lablab purpureus subsp. purpureus	India	Asia	South	70	light green	brown	green	green	white	flat and long	4.38	1.9	3.64	1.54	9.528	6.452	4.38	3.6	II	IV	A
55	96	APG 50412			52551					IBS 890, AusTRCF 52551	APG	cultivated	Lablab purpureus subsp. purpureus	India	Asia	South	73	green	brown	green	green	white	flat and long	4.84	2.04	4.75	2.075	11.434	7.558	4.346	2.5	II	IV	A
59	101	APG 50470								TLN 13, AusTRCF 309490	APG	cultivated	Lablab purpureus (L.) Sweet	Nigeria	Africa	West	73	-	-	green	green	white	Not available	4.5	1	Not available	Not available	Not available	Not available	Not available	Not available	II	IV	A
61	104	APG 50445			103823	22727		24746		AusTRCF 103823	APG	cultivated	Lablab purpureus subsp. purpureus	Sudan	Africa	East	97	green	brown	green	green	white	flat and long	5.06	2.18	4.7	1.92	11.348	7.444	4.004	2.4	II	IV	A
62	105	APG 50394			52533					IBS 863, AusTRCF 52533	APG	cultivated	Lablab purpureus subsp. purpureus	India	Asia	South	58	green	brown	green	green	white	flat and long	4.24	1.68	4.68	1.62	9.182	7.39	4.52	3.6	II	IV	A
64	107	APG 50434			76998					MM 575, AusTRCF 76998	APG	cultivated	Lablab purpureus subsp. purpureus	Zambia	Africa	South	91	green	brown	green	green	white	flat and long	4.34	1.74	4.76	1.8	9.892	7.572	4.53	3.6	II	IV	A
65	108	APG 50389			52528					IBS 859, AusTRCF 52528	APG	cultivated	Lablab purpureus subsp. purpureus	India	Asia	South	116	green	brown	green	green	white	flat and long	5.1	2.34	5.98	2.32	12.826	9.06	5.946	4	II	IV	A
67	111	APG 50437			91735	22721		24802		AusTRCF 91735	APG	cultivated	Lablab purpureus subsp. purpureus	India	Asia	South	60	green	brown	green	green	Not available	flat and long	4	1.56	4.04	1.72	9.934	7.03	4.486	2.6	II	IV	A
68	112	APG 50444			103822	22726		24745	666237	AusTRCF 103822	APG	cultivated	Lablab purpureus subsp. purpureus	Sudan	Africa	East	85	green	brown	green	green	white	flat and long	4.66	2.14	4.44	1.96	11.2375	7.4575	4.5075	2.6	II	IV	A
69	113	APG 50430			75421					AusTRCF 75421	APG	cultivated	Lablab purpureus subsp. purpureus	Kenya	Africa	East	-	green	brown	purple	green	purple	flat and long	7.83333	2.43333	8.36	2.18	11.902	8.682	5.162	4.4	II	IV	A
70	114	APG 50400			52539					IBS 887, AusTRCF 52539	APG	cultivated	Lablab purpureus subsp. purpureus	India	Asia	South	135	green	brown	green	green	white	flat and long	4.06	1.76	3.88	1.64	8.774	6.704	5.118	4	II	IV	A
71	115	APG 50413			52552					IBS 889, AusTRCF 52552	APG	cultivated	Lablab purpureus subsp. purpureus	India	Asia	South	68	green	brown	green	green	white	flat and long	4.46	2.04	4.7	1.96	10.76	7.222	4.458	3.2	II	IV	A
74	118	APG 50382			52521					IBS 892, AusTRCF 52521	APG	cultivated	Lablab purpureus subsp. purpureus	India	Asia	South	148	green with purple outer	brown	purple	green	purple	flat and long	Not available	Not available	6.94	1.58	10.664	8.59	5.182	4.6	II	IV	A
75	119	APG 50427			65341				365219	AusTRCF 65341	APG	cultivated	Lablab purpureus subsp. bengalensis	Guinea, (ex USA)	Africa	West	43	green	brown	green	green	purple	Not available	9.1	1.12	7.7	1	11.208	6.712	5.296	4.4	II	IV	A
76	120	APG 50436		VI055307	81626	22657		21086		AusTRCF 81626, Avori co 6 (green)	APG	cultivated	Lablab purpureus subsp. bengalensis	India	Asia	South	56	green	brown	green	green	white	Not available	8.8	1.6	7.96	1.16	11.75	7.114	5.942	5	II	IV	A
77	121	APG 50386			52525					IBS 896, AusTRCF 52525	APG	cultivated	Lablab purpureus subsp. purpureus	India	Asia	South	47	light green	brown	green	green	white	flat and long	5.54	1.96	5.22	1.7	10.436	7.678	5.444	4	II	IV	A
78	122	APG 50475								048U, M/76/460, AusTRCF 309499	APG	cultivated	Lablab purpureus subsp. purpureus	South Africa	Africa	South	96	green	brown	green	green	white	flat and long	4.58	1.86	5.7	1.94	11.22	8.174	5.47	4	II	IV	A
79	123	APG 50385			52524					IBS 895, AusTRCF 52524	APG	cultivated	Lablab purpureus subsp. bengalensis	India	Asia	South	113	green	brown	green	green	white	Not available	8.5	1.5	8.26	1.3	10.92	7.27	5.548	5	II	IV	A
80	124	APG 50424			60215					RWS 117, AusTRCF 60215	APG	cultivated	Lablab purpureus subsp. purpureus	Tanzania	Africa	East	110	green	brown	green	green	purple	flat and long	4.5	1.66	4.875	1.9	10.786	7.498	5.118	2.75	II	IV	A
81	125	APG 50481								021X, U/69/93, AusTRCF 309505	APG	cultivated	Lablab purpureus subsp. purpureus	South Africa	Africa	South	112	green	brown	green	green	white	flat and long	4.64	2.1	4.58	1.74	10.084	7.176	5.364	4	III	IV	A
82	126	APG 50432			76996					MM 520, AusTRCF 76996	APG	cultivated	Lablab purpureus subsp. purpureus	Zambia	Africa	South	107	green	brown	green	green	purple	flat and long	4.2	1.76	4.52	1.7	10.886	8.474	5.382	3.2	II	IV	A
83	127	APG 50480								298, U/69/47, AusTRCF 309504	APG	cultivated	Lablab purpureus subsp. purpureus	South Africa	Africa	South	108	green	brown	green	green	white	flat and long	4.94	2.04	5.08	2.02	10.864	7.942	4.824	3.6	III	IV	A
84	129	APG 50479								021K, Pers, AusTRCF 309503	APG	cultivated	Lablab purpureus subsp. purpureus	South Africa	Africa	South	82	green	brown	green	green	purple	flat and long	4.52	2.04	4.8	2	11.066	7.872	4.908	3.4	III	IV	A
85	130	APG 50410			52549					IBS 873, AusTRCF 52549	APG	cultivated	Lablab purpureus subsp. purpureus	India	Asia	South	150	green with purple outer	brown	purple	green	purple	flat and long	8.68	2.18	9.78	2.16	Not available	Not available	Not available	5.2	II	IV	A
86	131	APG 50476								048V, M/76/461, AusTRCF 309500	APG	cultivated	Lablab purpureus subsp. purpureus	South Africa	Africa	South	-	-	brown	green	green	Not available	Not available	Not available	Not available	4.42	1.8	10.206	7.192	4.06	2.2	II	IV	A
87	132	APG 50478								048X, M/78/366, AusTRCF 309502	APG	cultivated	Lablab purpureus (L.) Sweet	South Africa	Africa	South	-	-	-	green	green	Not available	Not available	Not available	Not available	Not available	Not available	Not available	Not available	Not available	Not available	II	IV	A
88	134	APG 50471								TLN 14, AusTRCF 309491	APG	cultivated	Lablab purpureus (L.) Sweet	Nigeria	Africa	West	-	-	-	Not available	Not available	Not available	Not available	Not available	Not available	Not available	Not available	Not available	Not available	Not available	Not available	II	IV	A
89	137	APG 50421			57315	22713		24795		AusTRCF 57315	APG	cultivated	Lablab purpureus subsp. purpureus	unknown	unknown	unknown	56	green	brown	green	green	purple	flat and long	3.9	1.62	4.72	1.98	9.73	6.842	3.838	3.8	II	IV	A
90	138	APG 50408			52547					IBS 865, AusTRCF 52547	APG	cultivated	Lablab purpureus subsp. purpureus	India	Asia	South	63	green	brown	green	green	white	flat and long	4.2	1.88	3.84	1.72	10.474	7.27	4.472	2.4	II	IV	A
91	139	APG 50409			52548					IBS 872, AusTRCF 52548	APG	cultivated	Lablab purpureus (L.) Sweet	India	Asia	South	148	-	-	green	green	white	Not available	4.83333	0.633333	Not available	Not available	Not available	Not available	Not available	Not available	II	IV	A
92	140	APG 50455			106696					IBS 3970, V 58, AusTRCF 106696	APG	cultivated	Lablab purpureus subsp. purpureus	India	Asia	South	95	green	brown	purple	green	purple	flat and long	7.8	1.52	8.43333	1.4	8.7675	7.4925	5.1625	4	II	IV	A
94	142	APG 50352			34778					IC 10191, AusTRCF 34778	APG	cultivated	Lablab purpureus subsp. purpureus	India	Asia	South	104	green	brown	green	green	white	flat and long	5.32	2.3	4.92	1.88	11.676	8.236	5.268	3.4	III	IV	A
95	143	APG 50353			34779					IC 10193, AusTRCF 34779	APG	cultivated	Lablab purpureus subsp. purpureus	India	Asia	South	65	green	brown	green	green	purple	flat and long	9.14	2.52	6.96	1.76	12.062	9.084	6.248	4	II	IV	A
96	144	APG 50360		VI055313	35894	22652		21043	388010	AusTRCF 35894	APG	cultivated	Lablab purpureus subsp. purpureus	unknown	unknown	unknown	43	light green	brown	green	green	white	flat and long	6.54	2.4	6.92	2.3	10.812	7.802	4.88	4	II	IV	A
98	146	APG 50346			34772					IC 1846, AusTRCF 34772	APG	cultivated	Lablab purpureus subsp. bengalensis	India	Asia	South	56	green	brown	green	green	white	round and long	9.2	1.5	8.26	1.04	11.702	7.15	5.634	4.8	II	IV	A
99	147	APG 50378			52514					IBS 434, AusTRCF 52514	APG	cultivated	Lablab purpureus subsp. purpureus	Zambia	Africa	South	67	green	brown	green	green	white	flat and long	4.5	1.8	4.84	1.82	9.266	6.884	4.184	3.8	II	IV	A
100	148	APG 50374			52508					Feijao mascate No 21, IBS 011, IIAA No B 8125, AusTRCF 52508	APG	cultivated	Lablab purpureus subsp. bengalensis	Mozambique	Africa	East	64	green	brown	green	green	white	flat and long	4.84	1.72	4.74	1.72	9.332	7.512	4.612	3.2	II	IV	A
101	149	APG 50340								CQ 3628, AusTRCF 322346	APG	cultivated	Lablab purpureus (L.) Sweet	Guinea	Africa	West	-	-	-	green	green	Not available	Not available	Not available	Not available	Not available	Not available	Not available	Not available	Not available	Not available	II	IV	A
102	150	APG 50362		VI059429	36903	22653		21044	388012	AusTRCF 36903	APG	cultivated	Lablab purpureus subsp. purpureus	unknown	unknown	unknown	62	green	brown	green	green	purple	flat and long	4.1	2	4.46	1.92	9.558	6.93	3.996	3.6	II	IV	A
103	151	APG 50357			34783					PUSA GREEN, AusTRCF 34783	APG	cultivated	Lablab purpureus subsp. purpureus	India	Asia	South	150	-	brown	green	green	white	Not available	5.1	2.04	5.36	2.06	Not available	Not available	Not available	3.2	II	IV	A
104	152	APG 50358			35771					AusTRCF 35771	APG	cultivated	Lablab purpureus subsp. purpureus	unknown	unknown	unknown	67	green	brown	green	green	purple	flat and long	4.16	1.9	4.24	1.76	9.81	6.458	3.722	3.2	II	IV	A
105	153	APG 50337						13686		AusTRCF 322337	APG	cultivated	Lablab purpureus subsp. purpureus	Ethiopia	Africa	East	62	green	brown	green	green	white	round and long	6.14	1.38	5.54	1.14	10.802	7.656	6.964	4.4	II	IV	A
106	154	APG 50329						14457		AusTRCF 322329	APG	cultivated	Lablab purpureus subsp. purpureus	Ethiopia	Africa	East	150	green	-	green	green	white	flat and long	3.68	1.64	4.74	1.82	10.006	7.17	3.822	2.8	II	IV	A
108	156	APG 50347			34773					IC 3353, AusTRCF 34773	APG	cultivated	Lablab purpureus subsp. purpureus	India	Asia	South	60	green	brown	green	green	white	flat and long	6.9	1.56	7.02	1.5	10.99	8.536	5.564	3.6	II	IV	A
112	160	APG 50377			52513					IBS 433, AusTRCF 52513	APG	cultivated	Lablab purpureus subsp. purpureus	Zambia	Africa	South	63	green	brown	green	green	white	flat and long	4.5	1.83333	4.1	1.72	9.2	6.846	3.82	3.2	II	IV	A
114	162	APG 50336				22767		14441		AusTRCF 322336	APG	cultivated	Lablab purpureus subsp. purpureus	Ethiopia, Senegal	Africa	East	17	green	brown	green	green	white	flat and long	5.24	2.14	5.3	1.96	10.978	8.11	5.19	3.8	III	IV	A
115	163	APG 50339								CQ3627, AusTRCF 322345	APG	cultivated	Lablab purpureus subsp. purpureus	Guinea, (ex South Africa)	Africa	West	-	-	-	green	green	Not available	Not available	Not available	Not available	Not available	Not available	Not available	Not available	Not available	Not available	II	IV	A
116	164	APG 50355			34781					IC 10682, AusTRCF 34781	APG	cultivated	Lablab purpureus subsp. purpureus	India	Asia	South	19	green	brown	green	green	white	flat and long	5.18	2.22	5.08	2.02	11.742	8.106	5.232	3.8	III	IV	A
117	165	APG 50373			52507A					COR BRANCA, B 8126, AusTRCF 52507	APG	cultivated	Lablab purpureus subsp. purpureus	Angola	Africa	Central	150	green	brown	green	green	white	flat and long	4.16	1.62	5	1.83333	10.9	8.05	4.51667	2.33333	III	IV	A
120	168-1	APG 50331						13685		AusTRCF 322331	APG	cultivated	Lablab purpureus (L.) Sweet	Ethiopia	Africa	East	-	-	-	green	green	Not available	Not available	Not available	Not available	Not available	Not available	Not available	Not available	Not available	Not available	II	IV	A
121	168-2	APG 50331						13685		AusTRCF 322331	APG	cultivated	Lablab purpureus (L.) Sweet	Ethiopia	Africa	East	-	-	-	purple	green	Not available	Not available	Not available	Not available	Not available	Not available	Not available	Not available	Not available	Not available	II	IV	A
122	169	APG 50349			34775					IC 10079, AusTRCF 34775	APG	cultivated	Lablab purpureus subsp. purpureus	India	Asia	South	55	green	brown	green	green	white	flat and long	6.7	1.66	6.78	1.46	10.32	8.522	5.046	4.2	II	IV	A
123	170	APG 50341								CQ 3632, AusTRCF 322347	APG	cultivated	Lablab purpureus subsp. purpureus	Guinea	Africa	West	56	green	brown	green	green	purple	flat and long	3.9	1.96	4.48	1.86	9.316	6.72	3.964	4	II	IV	A
124	171	APG 50372			52504 seln A					IBS 007, AusTRCF 52504	APG	cultivated	Lablab purpureus subsp. purpureus	Angola	Africa	Central	61	green	brown	green	green	purple	flat and long	4.36	2	4.48	1.9	9.872	6.76	4.072	3.8	II	IV	A
125	172	APG 50342			24616				284802	AusTRCF 324388	APG	cultivated	Lablab purpureus subsp. purpureus	China	Asia	East	46	green	brown	green	green	purple	flat and long	4.44	1.84	4.82	1.88	10.052	6.866	4.142	4	II	IV	A
126	173	APG 50368			51565					AusTRCF 51565	APG	cultivated	Lablab purpureus subsp. bengalensis	Zambia	Africa	South	-	-	brown	green	green	Not available	Not available	Not available	Not available	Not available	Not available	Not available	Not available	Not available	Not available	II	IV	A
128	175	APG 50348			34774					IC 7467, AusTRCF 34774	APG	cultivated	Lablab purpureus subsp. purpureus	India	Asia	South	86	green	brown	green	green	white	flat and long	5.94	2.06	4.94	1.6	11.252	8.832	7.076	4.2	II	IV	A
130	178	APG 50335				22773		7072		AusTRCF 322335	APG	cultivated	Lablab purpureus subsp. bengalensis	ex Ethiopia	Africa	East	-	green	-	green	green	white	flat and long	5.28	1.6	Not available	Not available	Not available	Not available	Not available	Not available	II	IV	A
131	179	APG 50364			39078					RJW 5117, AusTRCF 39078	APG	cultivated	Lablab purpureus subsp. purpureus	Brazil	America	South	52	green	brown	green	green	white	flat and long	5.36	2.16	5.38	1.92	10.162	7.14	4.062	3.4	II	IV	A
132	180	APG 50361			36019	22518		24769		AusTRCF 36019	APG	cultivated	Lablab purpureus subsp. purpureus	Hungary	Europe	Europe	56	green	brown	green	green	purple	flat and long	4.4	1.98	4.94	1.98	10.518	7.436	4.174	3.6	II	IV	A
133	181	APG 50345							639278	Grif 1246, AusTRCF 324391	APG	cultivated	Lablab purpureus subsp. bengalensis	India	Asia	South	53	green	brown	green	green	white	round and long	7.8	1.72	9.4	1.2	11.87	8.398	6.282	4.4	II	IV	A
134	182	APG 50338						10527		AusTRCF 322338	APG	cultivated	Lablab purpureus subsp. purpureus	Ethiopia	Africa	East	150	-	brown	green	green	purple	Not available	8.82	2.58	7.1	2.3	10.53	7.97333	5.62333	3	II	IV	A
135	183	APG 50356			34782					EC 18129, AusTRCF 34782	APG	cultivated	Lablab purpureus subsp. purpureus	India	Asia	South	-	green	brown	green	green	white	flat and long	5.14	2.32	4.92	2.04	10.848	7.85	4.618	3.4	III	IV	A
136	184	APG 50369			51566					AusTRCF 51566	APG	cultivated	Lablab purpureus subsp. purpureus	Zambia	Africa	South	129	green	brown	green	green	white	flat and long	3.78	1.7	4.02	1.8	11.362	7.946	5.408	3.2	II	IV	A
137	185	APG 50334		VI058765		22761		11613		AusTRCF 322334	APG	cultivated	Lablab purpureus subsp. bengalensis	Ethiopia, ex Mali	Africa	East	19	green	brown	green	green	purple	flat and long	9	2.8	9.44	2.68	11.926	8.374	5.862	4.8	II	IV	A
138	186	APG 50350			34776					IC 10189, AusTRCF 34776	APG	cultivated	Lablab purpureus subsp. purpureus	India	Asia	South	96	green	brown	green	green	white	flat and long	4.64	1.96	4.38	1.8	10.434	7.556	5.89	3.8	II	IV	A
139	187	APG 50330						14439		K 77301M, AusTRCF 322330	APG	cultivated	Lablab purpureus subsp. purpureus	Ethiopia, (ex Australia/ origin KEN?)	Africa	East	-	-	brown	green	green	white	Not available	4.38	1.74	4.4	1.8	10.7533	7.60333	4.57	3	II	IV	A
140	188	APG 50333		VI055316		22766		14437		AusTRCF 322333	APG	cultivated	Lablab purpureus subsp. purpureus	Ethiopia, Zimbabwe	Africa	East	92	green	brown	green	green	purple	flat and long	5.1	2.08	5.78	2.02	11.482	8.484	4.744	4	II	IV	A
141	189	APG 50359			35893	22688				AusTRCF 35893	APG	cultivated	Lablab purpureus subsp. purpureus	Denmark	Europe	Europe	57	purple	brown	purple	purple	purple	flat and long	4.24	1.96	5.36	2.32	10.688	7.918	4.888	3.2	II	IV	A
143	192	APG 50283			52506 seln B					IIAA No E 275, IBS 009, AusTRCF 318703	APG	cultivated	Lablab purpureus subsp. purpureus	Angola	Africa	Central	107	green	brown	green	green	Not available	flat and long	3.4	1.63333	3.76667	1.63333	8.552	5.93	3.862	3.66667	II	IV	A
144	194	APG 50271			30702	22651		14551			APG	cultivated	Lablab purpureus (L.) Sweet	Myanmar	Asia	Southeast	-	-	-	green	green	Not available	Not available	Not available	Not available	Not available	Not available	Not available	Not available	Not available	Not available	II	IV	A
145	195	APG 50303								IRI 1303, Q6988, AusTRCF 320850	APG	cultivated	Lablab purpureus subsp. purpureus	Brazil	America	South	46	green	brown	green	green	white	flat and long	4.48	1.78	5.26	1.9	8.694	6.742	4.682	4	II	IV	A
147	198	APG 50309				22770		6533		AusTRCF 322309	APG	cultivated	Lablab purpureus (L.) Sweet	ex Ethiopia	Africa	East	-	-	-	green	green	Not available	Not available	Not available	Not available	Not available	Not available	Not available	Not available	Not available	Not available	II	IV	A
148	199-1	APG 50315						14447		AusTRCF 322315	APG	cultivated	Lablab purpureus subsp. purpureus	Ethiopia	Africa	East	144	green	-	green	green	purple	flat and long	3.9	1.6	Not available	Not available	Not available	Not available	Not available	Not available	II	IV	A
150	200	APG 50288								AusTRCF 319913, ATF 827	APG	cultivated	Lablab purpureus (L.) Sweet	Myanmar	Asia	Southeast	-	-	-	green	green	Not available	Not available	4.08	1.28	Not available	Not available	Not available	Not available	Not available	Not available	II	IV	A
151	201	APG 50289								CQ 2975, AusTRCF 320191	APG	cultivated	Lablab purpureus subsp. purpureus	unknown	unknown	unknown	93	light green	brown	green	green	white	round, short	4.08	1.26	3.86	1.1	8.356	6.534	4.8	4.2	II	IV	A
152	202-1	APG 50308						14419		K 5882B, AusTRCF 322308	APG	cultivated	Lablab purpureus subsp. purpureus	Ethiopia, (Zimbabwe)	Africa	East	111	-	brown	green	green	Not available	Not available	4.28	1.5	4.9	1.88	9.952	7.498	4.65	4	II	IV	A
153	202-2	APG 50308								ILRI 14419, AusTRCF 322308	APG	cultivated	Lablab purpureus subsp. purpureus	Ethiopia	Africa	East	111	green	brown	green	green	white	flat and long	5.1	2.08	5.16	2.1	11.204	8.034	5.152	3.8	III	IV	A
154	203	APG 50280								SSN# 1703, AusTRCF 317974	APG	cultivated	Lablab purpureus subsp. purpureus	Australia	Australia	Australia	107	green	brown	green	green	purple	flat and long	8.88	2.62	9.14	2.6	12.398	8.834	5.948	4.6	II	IV	A
155	204	APG 50278								SSN# 1026B, AusTRCF 317964	APG	cultivated	Lablab purpureus subsp. purpureus	Australia	Australia	Australia	82	-	brown	green	green	purple	Not available	10.4	3	9.66	2.86	11.872	8.402	5.36	4.6	II	IV	A
156	205	APG 50317		VI058768		22762		11615		AusTRCF 322317	APG	cultivated	Lablab purpureus subsp. bengalensis	Ethiopia, Burkina Faso	Africa	East	56	green	brown	green	green	white	round and long	8.4	1.44	7.52	1.08	11.668	7.302	6.338	4.2	II	IV	A
157	206	APG 50314				22763		11630		AusTRCF 322314	APG	cultivated	Lablab purpureus subsp. purpureus	Ethiopia, (Mali)	Africa	East	108	green	brown	green	green	white	flat and long	5.08	2.12	5.1	2.08	11.686	8.012	5.128	4	III	IV	A
158	207	APG 50306								HCM 206, AusTRCF 321677	APG	cultivated	Lablab purpureus subsp. purpureus	Vietnam	Asia	Southeast	115	green	brown	green	green	purple	Not available	9.1	2.22	10.2	1.92	11.848	8.292	6.088	5	II	IV	A
159	208-1	APG 50323						14428		AusTRCF 322323	APG	cultivated	Lablab purpureus subsp. purpureus	Ethiopia	Africa	East	67	green	brown	green	green	purple	flat and long	5.76	2.32	6	2.26	11.832	8.476	4.122	3.2	II	IV	A
160	208-2	APG 50323						14428		AusTRCF 322323	APG	cultivated	Lablab purpureus subsp. purpureus	Ethiopia	Africa	East	-	green	brown	green	green	white	flat and long	4.26	1.54	5.18	2	10.44	7.59	5.05667	3.4	II	IV	A
161	209-1	APG 50323						14428		AusTRCF 322323	APG	cultivated	Lablab purpureus subsp. purpureus	Ethiopia	Africa	East	-	green	brown	green	green	purple	flat and long	5	1.7	3.84	1.28	10.182	7.41	4.894	4	II	IV	A
163	210	APG 50321		VI055309		22765		14411		AusTRCF 322321	APG	cultivated	Lablab purpureus subsp. purpureus	Ethiopia, Kenya	Africa	East	118	green	brown	green	green	white	flat and long	4.58	1.76	4.94	1.98	Not available	Not available	Not available	3	II	IV	A
164	211	APG 50310						7519		AusTRCF 322310	APG	cultivated	Lablab purpureus (L.) Sweet	Ethiopia	Africa	East	151	-	-	green	green	Not available	Not available	3.7	1.48	4.62	1.7	10.446	7.702	5.086	3.4	II	IV	A
165	212	APG 50311				22774		13687		AusTRCF 322311	APG	cultivated	Lablab purpureus subsp. purpureus	Ethiopia	Africa	East	151	-	brown	green	green	white	Not available	7.24	2.14	6.5	2.3	12.3	8.99	4.42	3	II	IV	A
167	214	APG 50318						14448		AusTRCF 322318	APG	cultivated	Lablab purpureus subsp. purpureus	Ethiopia	Africa	East	99	green	brown	green	green	white	flat and long	4.92	2.1	4.92	2.08	12.154	8.052	4.504	3	II	IV	A
169	217	APG 50277								Emmot hyacynth bean, SSN# 1733, AusTRCF 317963	APG	cultivated	Lablab purpureus subsp. purpureus	Australia	Australia	Australia	111	green	brown	green	green	purple	flat and long	8	2.5	10.4	2.76	11.934	8.826	5.51	5.6	II	IV	A
170	219	APG 50269			30213					DL 173, Q6059, AusTRCF 30213	APG	cultivated	Lablab purpureus subsp. purpureus	India	Asia	South	119	green	brown	green	green	white	flat and long	4.6	1.72	4.76	1.94	10.448	7.618	5.494	4	III	IV	A
171	220	APG 50265			29400					AusTRCF 29400	APG	cultivated	Lablab purpureus subsp. purpureus	Indonesia	Asia	Southeast	88	green	brown	green	green	white	flat and long	5.2	1.94	5.38	1.7	10.646	8.658	5.084	3.6	II	IV	A
172	221	APG 50263		VI058783	29398	22650		10979	316574		APG	cultivated	Lablab purpureus subsp. purpureus	Indonesia	Asia	Southeast	96	green	brown	green	green	purple	flat and long	5.44	2.12	5.68	2	10.458	7.584	4.926	4.6	II	IV	A
174	223	APG 50313						14474		AusTRCF 322313	APG	cultivated	Lablab purpureus subsp. purpureus	Ethiopia	Africa	East	95	green	brown	green	green	white	flat and long	4.54	2.2	6.58	2.1	11.684	8.21	4.548	4.6	II	IV	A
175	224	APG 50281			29398A					AusTRCF 318484	APG	cultivated	Lablab purpureus subsp. purpureus	Indonesia	Asia	Southeast	101	green	brown	green	green	white	flat and long	5.7	2.26	6.4	2.02	10.01	7.402	5.052	3.8	II	IV	A
177	226	APG 50307				22771		6536		AusTRCF 322307	APG	cultivated	Lablab purpureus subsp. purpureus	ex Ethiopia	Africa	East	105	green	brown	green	green	white	flat and long	4.96	2.34	5.24	2.08	11.618	7.978	5.072	4	II	IV	A
178	227	APG 50324						14434		AusTRCF 322324	APG	cultivated	Lablab purpureus subsp. purpureus	Ethiopia	Africa	East	117	-	-	green	green	white	Not available	3.78	1.56	4.46	1.7	9.968	7.346	3.734	2.8	II	IV	A
179	228	APG 50327						13688		AusTRCF 322327	APG	cultivated	Lablab purpureus subsp. purpureus	Ethiopia	Africa	East	107	green	-	green	green	white	flat and long	5.72	2.36	Not available	Not available	Not available	Not available	Not available	Not available	III	IV	A
180	229	APG 50279								Wilkinson hyacynth bean, Fodder lablab, SSN# 1765, AusTRCF 317965	APG	cultivated	Lablab purpureus subsp. purpureus	Australia	Australia	Australia	99	green	brown	green	green	white	flat and long	4.9	2.12	5.24	2.04	11.104	7.792	4.86	4	III	IV	A
182	232	APG 50328						7403		AusTRCF 322328	APG	cultivated	Lablab purpureus subsp. purpureus	Ethiopia	Africa	East	106	green	brown	green	green	white	flat and long	5	2.1	5.08	1.9	11.236	7.862	5.194	3.6	III	IV	A
183	233	APG 50290								CQ 3319, AusTRCF 320248	APG	cultivated	Lablab purpureus subsp. purpureus	Guinea	Africa	West	108	green	brown	green	green	white	flat and long	5.82	2.44	6.1	2.1	10.69	7.424	4.934	3.5	II	IV	A
184	234	APG 50282			52504 seln B					IIAA E 1293, IBS 007, AusTRCF 318702	APG	cultivated	Lablab purpureus subsp. purpureus	Angola	Africa	Central	69	green	brown	green	green	purple	flat and long	4.3	2.02	4.5	1.92	9.782	6.826	3.988	3.4	II	IV	A
185	235	APG 50266			29803					DBP 128, AusTRCF 29803	APG	cultivated	Lablab purpureus subsp. bengalensis	India	Asia	South	63	green	brown	green	green	purple	round and long	6.9	1.42	6.6	1.44	10.134	7.48	5.864	4.6	II	IV	A
187	237	APG 50257			16883					AusTRCF 16883	APG	cultivated	Lablab purpureus subsp. purpureus	Kenya	Africa	East	109	green	brown	green	green	white	flat and long	4.72	2	5	2.02	10.842	7.472	4.57	3.6	III	IV	A
188	238	APG 50325						14480		AusTRCF 322325	APG	cultivated	Lablab purpureus subsp. bengalensis	Ethiopia	Africa	East	62	green	brown	green	green	white	round and long	8.38	1.38	7.06	1.1	11.494	7.356	5.92	3.8	II	IV	A
189	239	APG 50264			29399	22673		24752		40-1, AusTRCF 29399	APG	cultivated	Lablab purpureus subsp. purpureus	Indonesia	Asia	Southeast	69	green	brown	green	green	purple	flat and long	5.2	2.16	5.74	2.14	10.802	7.85	4.794	3.6	II	IV	A
191	241	APG 50316						14471		K-54220, AusTRCF 322316	APG	cultivated	Lablab purpureus subsp. purpureus	Ethiopia, Zimbabwe	Africa	East	90	green	brown	green	green	white	flat and long	5.1	1.94	5.82	2	11.164	8.716	5.322	3.6	II	IV	A
192	242	APG 50259			24296					Pe pazun, AusTRCF 24296	APG	cultivated	Lablab purpureus subsp. bengalensis	Myanmar	Asia	Southeast	107	green	brown	green	green	white	round and long	10.68	0.92	9.78	1	12.255	6.29	5.635	5.2	II	IV	A
193	243	APG 50319				22769		6930		AusTRCF 322319	APG	cultivated	Lablab purpureus subsp. bengalensis	Ethiopia	Africa	East	53	green	brown	green	green	white	round and long	7.8	0.78	8.38	1.04	11.094	6.982	5.48	4.4	II	IV	A
194	244	APG 50286			52518C			24784		AusTRCF 318706	APG	cultivated	Lablab purpureus subsp. purpureus	Guinea, (India)	Africa	West	149	green	brown	green	green	white	flat and long	4.72	1.86	5.26	2.06	9.905	7.01	3.71	3.8	II	IV	A
195	245	APG 50256			16882	22664		24748			APG	cultivated	Lablab purpureus subsp. purpureus	Kenya	Africa	East	125	green	brown	green	green	purple	flat and long	4.36	1.54	4.14	1.72	10.428	7.66	3.646	3	II	IV	A
196	247	147	50305	VI058797	30212	22660		147	387994, 401553	Highworth, L 9-87, Q 6059	ILRI	cultivated	Lablab purpureus subsp. purpureus	India	Asia	South	97	green	brown	green	green	purple	flat and long	4.24	2.06	5.02	2.02	11.168	7.976	4.97	3.4	III	IV	A
197	249	6529								Jhansi, N 77290, N 82425, ILCA 77291	ILRI	cultivated	Lablab purpureus (L.) Sweet	unknown	unknown	unknown	112	green	brown	green	green	white	flat and long	5	2.06	4.88	1.94	11.194	7.934	5.304	3.6	III	IV	A
198	251	6534								H 107	ILRI	cultivated	Lablab purpureus (L.) Sweet	unknown	unknown	unknown	-	-	-	Not available	Not available	Not available	Not available	Not available	Not available	Not available	Not available	Not available	Not available	Not available	Not available	II	IV	A
200	257	7278									ILRI	cultivated	Lablab purpureus subsp. purpureus	unknown	unknown	unknown	104	green	brown	green	green	white	flat and long	4.6	2.12	4.8	2.02	10.726	7.934	4.824	3	III	IV	A
201	259	7403									ILRI	cultivated	Lablab purpureus subsp. purpureus	unknown	unknown	unknown	113	green	brown	green	green	white	flat and long	5	2.06	5.08	1.96	10.866	8.132	5.238	3.8	II	IV	A
202	263-1	10954			30213	22677			316575, 387995	IRFL 771, Q 6059,	ILRI	cultivated	Lablab purpureus subsp. purpureus	India	Asia	South	117	green	brown	green	green	white	flat and long	4.58	1.96	4.44	1.78	10.404	7.47	5.354	3.8	III	IV	A
203	263-2	10954			30213	22677			316575, 387995	IRFL 771, Q 6059,	ILRI	cultivated	Lablab purpureus subsp. purpureus	India	Asia	South	122	-	brown	green	green	white	Not available	4.48	1.54	4.48	1.82	10.796	7.95	5.502	3.4	III	IV	A
204	264	10977								IRFL 1859	ILRI	cultivated	Lablab purpureus subsp. purpureus	unknown	unknown	unknown	93	green	brown	green	green	Not available	flat and long	4.4	1.96	4.76	1.9	11.716	8.058	4.812	3	III	IV	A
205	265	10979	50457	VI058783	29398	22650		10979	316574	IRFL 770	ILRI	cultivated	Lablab purpureus subsp. purpureus	Indonesia	Asia	Southeast	95	green	brown	green	green	purple	flat and long	4.9	1.78	15.04	1.98	9.692	7.702	4.886	3.8	II	IV	A
206	268	11609						11609		Rongai Noir, N 82424	ILRI	cultivated	Lablab purpureus subsp. purpureus	Kenya	Africa	East	89	green	brown	green	green	Not available	flat and long	4.62	2.1	5.18	2.08	11.598	8.306	4.742	3.4	III	IV	A
208	271	11612	50459		P5305	22755		11612		P5305, N 80015, AusTRCF 320570, AusTRCF 302194	ILRI	cultivated	Lablab purpureus subsp. purpureus	unknown	unknown	unknown	77	green	brown	green	green	white	flat and long	4.72	2.18	4.9	2.02	11.33	7.98	4.284	3	II	IV	A
209	278	11619	50266		29803	22675				N 82497	ILRI	cultivated	Lablab purpureus subsp. bengalensis	India	Asia	South	91	green	brown	green	green	purple	round and long	7.74	1.8	5.2	0.96	10.12	6.982	6.228	3.4	II	IV	A
210	279-1	11620								G 1364, N 82786	ILRI	cultivated	Lablab purpureus subsp. purpureus	unknown	unknown	unknown	-	-	-	green	green	Not available	Not available	Not available	Not available	5.46	1.92	Not available	Not available	Not available	3.4	II	IV	A
211	279-2	11620								G 1364, N 82786	ILRI	cultivated	Lablab purpureus subsp. purpureus	unknown	unknown	unknown	150	-	brown	green	green	Not available	Not available	Not available	Not available	6	2.3	10.3	7.145	3.545	4	II	IV	A
212	280	11629								G 1368, N 82788	ILRI	cultivated	Lablab purpureus subsp. purpureus	unknown	unknown	unknown	92	green	brown	green	green	white	flat and long	5	1.74	5.34	1.58	9.586	7.698	4.886	4.6	II	IV	A
213	281	11630				22763		11630		N 69002	ILRI	cultivated	Lablab purpureus subsp. purpureus	Mali	Africa	West	104	green	brown	green	green	white	flat and long	5.3	2.18	4.9	2.06	11.592	8.354	5.172	3	III	IV	A
214	287	13685						13685		PGRC 211402	ILRI	cultivated	Lablab purpureus subsp. purpureus	Ethiopia	Africa	East	112	green	brown	green	green	purple	flat and long	6.1	2.2	6.42	2.46	12.466	8.594	5.36	3.5	II	IV	A
215	289	13687				22774		13687		PGRC 211406	ILRI	cultivated	Lablab purpureus subsp. purpureus	Ethiopia	Africa	East	113	-	-	green	green	Not available	Not available	6.03333	1.86667	Not available	Not available	Not available	Not available	Not available	Not available	II	IV	A
216	291	13689				22775		13689		PGRC 211409	ILRI	cultivated	Lablab purpureus subsp. purpureus	Ethiopia	Africa	East	114	-	brown	purple	green	Not available	Not available	6.86	2.2	7.24	2.38	12.732	8.48	5.096	3.8	II	IV	A
219	296	13696						13696		PGRC 211417, ETH cultivated	ILRI	cultivated	Lablab purpureus subsp. purpureus	Ethiopia	Africa	East	-	-	-	Not available	Not available	Not available	Not available	Not available	Not available	Not available	Not available	Not available	Not available	Not available	Not available	II	IV	A
221	298	13699						13699		PGRC 211422	ILRI	cultivated	Lablab purpureus subsp. purpureus	Ethiopia	Africa	East	150	green with purple outer	brown	purple	green	purple	flat and long	7.04	2.12	6.66	2.2	Not available	Not available	Not available	3.2	II	IV	A
223	301	13702						13702		PGRC 211425, ETH cultivated	ILRI	cultivated	Lablab purpureus subsp. purpureus	Ethiopia	Africa	East	111	green	brown	green	green	white	flat and long	4.66	2.24	5.02	2.02	11.314	7.372	4.44	3.6	III	IV	A
225	304-2	14410								K 5210F	ILRI	cultivated	Lablab purpureus subsp. purpureus	unknown	unknown	unknown	62	green	brown	green	green	purple	flat and long	4.46	1.96	4.58	1.84	11.854	8.004	5.42	2.8	II	IV	A
226	306	14413								K 78393	ILRI	cultivated	Lablab purpureus subsp. purpureus	unknown	unknown	unknown	103	green	brown	green	green	white	flat and long	4.74	2.16	4.875	2	11.61	7.786	4.552	3	II	IV	A
227	307	14414						14414		K 781067B, origin KEN?	ILRI	cultivated	Lablab purpureus subsp. purpureus	unknown	unknown	unknown	96	green	brown	green	green	purple	flat and long	4.68	2.02	5.18	2.02	11.602	7.838	4.928	3.4	III	IV	A
228	308	14415								K 54224C	ILRI	cultivated	Lablab purpureus subsp. purpureus	Zimbabwe	Africa	South	102	green	brown	green	green	purple	flat and long	5.52	2.5	5.72	2.1	11.256	7.606	4.462	4	II	IV	A
229	309	14416								K 54224G	ILRI	cultivated	Lablab purpureus subsp. purpureus	unknown	unknown	unknown	99	green	brown	green	green	purple	flat and long	3.98	1.58	4.225	1.525	10.466	8.316	4.67	2.5	II	IV	A
230	310	14417								K 68129	ILRI	cultivated	Lablab purpureus subsp. purpureus	unknown	unknown	unknown	103	green	brown	green	green	white	flat and long	5.18	2.24	5.14	1.98	11.134	7.872	5.046	3.6	III	IV	A
231	311	14418						14418		K 58164B	ILRI	cultivated	Lablab purpureus subsp. purpureus	Kenya	Africa	East	102	green	brown	green	green	white	flat and long	5.24	2.32	5.62	2.1	10.944	7.598	4.886	4	III	IV	A
232	312	14419						14419		K 5882B	ILRI	cultivated	Lablab purpureus subsp. purpureus	Zimbabwe	Africa	South	103	green	brown	green	green	white	flat and long	5.1	2.3	5.44	2	11.2	7.658	4.768	3.8	III	IV	A
233	315	14423						14423		K 77310, origin KEN?	ILRI	cultivated	Lablab purpureus subsp. purpureus	ex Australia	Australia	Australia	109	green	brown	green	green	white	flat and long	5.14	2.26	5.2	2.06	11.424	8.06	4.952	3.6	III	IV	A
234	316-2	14424								K 54210D	ILRI	cultivated	Lablab purpureus subsp. purpureus	unknown	unknown	unknown	111	green	brown	green	green	white	flat and long	4.88	2.26	5.15	2.1	11.424	7.962	4.204	3	II	IV	A
237	323-2	14430								K 78247	ILRI	cultivated	Lablab purpureus subsp. purpureus	unknown	unknown	unknown	111	green	brown	green	green	white	flat and long	4.68	2.1	5.85	2.1	11.06	7.704	4.95	4	III	IV	A
238	324-1	14431						14431		K 77547A	ILRI	cultivated	Lablab purpureus subsp. purpureus	Israel	Asia	West	108	green	brown	green	green	white	flat and long	4.78	2.16	5.85	2.1	11.112	7.758	5.1	4	III	IV	A
239	326-2	14434								K 54224	ILRI	cultivated	Lablab purpureus subsp. purpureus	unknown	unknown	unknown	117	-	brown	green	green	white	Not available	4.24	1.38	4.42	1.88	10.714	7.292	4.094	3	II	IV	A
240	327	14435						14435		K 54221G	ILRI	cultivated	Lablab purpureus subsp. purpureus	Zimbabwe	Africa	South	100	green	brown	green	green	white	flat and long	5.46	2.3	5.2	2.02	12.134	7.998	4.682	3.4	II	IV	A
241	328	14436								K 54224M	ILRI	cultivated	Lablab purpureus subsp. purpureus	unknown	unknown	unknown	93	green	brown	green	green	purple	flat and long	5.68	2.28	5.38	2	11.87	8.472	4.264	3.4	II	IV	A
242	329	14437		VI055316		22766		14437		K 54224H	ILRI	cultivated	Lablab purpureus subsp. purpureus	Zimbabwe	Africa	South	61	green	brown	green	green	purple	flat and long	5.5	2.18	5.44	1.84	10.75	8.18	4.37	4.2	II	IV	A
243	330-1	14438						14438		K 77552C, origin KEN?	ILRI	cultivated	Lablab purpureus subsp. purpureus	ex Australia	Australia	Australia	107	green	brown	green	green	white	flat and long	5.26	2.26	6.1	2.1	11.6275	8.3425	4.92	4	III	IV	A
244	333-2	14441				22767		14441		K 5882A	ILRI	cultivated	Lablab purpureus subsp. purpureus	Senegal	Africa	West	111	green	brown	green	green	white	flat and long	5.22	2.18	5.02	2.08	11.396	7.738	5.228	3.6	III	IV	A
245	334-2	14443								K 68129	ILRI	cultivated	Lablab purpureus subsp. purpureus	Kenya (KEN)	Africa	East	99	green	brown	green	green	white	flat and long	5.32	2.18	4.7	1.88	11.264	7.18	4.882	3	II	IV	A
247	337-1	14446								K 77301H	ILRI	cultivated	Lablab purpureus subsp. purpureus	unknown	unknown	unknown	107	green	brown	green	green	white	flat and long	5.28	2.28	5.9	2.025	11.054	8.24	4.872	3.5	III	IV	A
248	339-1	14448								K 54210F	ILRI	cultivated	Lablab purpureus subsp. purpureus	unknown	unknown	unknown	109	green	brown	green	green	white	flat and long	5.7	2.32	5.28	2.04	11.562	7.912	5.17	3.8	III	IV	A
249	339-2	14448								K 54210F	ILRI	cultivated	Lablab purpureus subsp. purpureus	unknown	unknown	unknown	102	green	brown	green	green	white	flat and long	4.78	2.08	4.82	2.02	11.882	8.21	4.572	2.8	II	IV	A
250	340	14449						14449		K 78239A	ILRI	cultivated	Lablab purpureus subsp. purpureus	Brazil	America	South	129	green	brown	green	green	white	flat and long	4.58	2.08	5	1.92	10.732	8.05	4.714	3.8	III	IV	A
251	341	14451						14451		K 781066A, origin KEN?	ILRI	cultivated	Lablab purpureus subsp. purpureus	ex Australia	Australia	Australia	110	green	brown	green	green	white	flat and long	5.42	2.22	5.16	2.02	11.14	7.822	4.904	4	III	IV	A
252	342	14452								K 77552B	ILRI	cultivated	Lablab purpureus subsp. purpureus	unknown	unknown	unknown	107	green	brown	green	green	white	flat and long	5.36	2.26	4.58	1.98	11.144	7.73	4.748	2.6	III	IV	A
253	343	14453								K 77301J	ILRI	cultivated	Lablab purpureus subsp. purpureus	unknown	unknown	unknown	113	green	brown	green	green	white	flat and long	5.16	2.18	5.12	1.98	10.652	7.736	4.592	3.2	III	IV	A
255	351	14461								K 78392B	ILRI	cultivated	Lablab purpureus subsp. purpureus	unknown	unknown	unknown	86	green	brown	green	green	Not available	flat and long	5.04	2.16	5.18	2	11.914	8.124	4.886	3.6	III	IV	A
256	353-1	14463								K 78392C	ILRI	cultivated	Lablab purpureus subsp. purpureus	unknown	unknown	unknown	104	green	brown	green	green	Not available	flat and long	5.3	2.1	5.68	2.08	11.05	7.592	4.342	4	II	IV	A
257	356	14466								K 77307	ILRI	cultivated	Lablab purpureus subsp. purpureus	unknown	unknown	unknown	84	green	brown	green	green	purple	flat and long	5.16	2.14	4.62	1.96	11.648	8.286	4.786	3	III	IV	A
258	359	14469								K 77310D	ILRI	cultivated	Lablab purpureus subsp. purpureus	unknown	unknown	unknown	102	green	brown	green	green	white	flat and long	5.38	2.12	5.18	2	11.276	7.93	5.156	3.8	III	IV	A
259	361	14471						14471		K-54220	ILRI	cultivated	Lablab purpureus subsp. purpureus	Zimbabwe	Africa	South	96	green	brown	green	green	white	flat and long	5.44	2.06	5.4	1.98	10.96	7.498	5.314	3.2	II	IV	A
260	364	14475								K 54226A	ILRI	cultivated	Lablab purpureus subsp. purpureus	unknown	unknown	unknown	101	green	brown	green	green	Not available	flat and long	4.68	2	5.1	1.98	10.9633	8.62667	4.66667	3	II	IV	A
261	365	14476								K 54220C	ILRI	cultivated	Lablab purpureus subsp. purpureus	unknown	unknown	unknown	109	green	brown	green	green	white	flat and long	4.2	1.72	4.74	2	11.792	7.79	4.886	2.8	III	IV	A
262	366	14477								K 54210	ILRI	cultivated	Lablab purpureus subsp. purpureus	unknown	unknown	unknown	103	green	brown	green	green	purple	flat and long	5.9	2.24	6.13333	2.13333	11.34	8.224	4.984	4	II	IV	A
263	367	14478								K 54224F	ILRI	cultivated	Lablab purpureus subsp. purpureus	unknown	unknown	unknown	113	green	brown	green	green	white	flat and long	5.4	1.9	5.16	1.82	10.62	7.37	4.72	3.6	II	IV	A
264	370	14481								K 78247A	ILRI	cultivated	Lablab purpureus subsp. purpureus	unknown	unknown	unknown	106	green	brown	green	green	white	flat and long	4.76	1.9	4.8	1.95	11.08	8.234	4.996	3	III	IV	A
265	371	14482								K 77552A	ILRI	cultivated	Lablab purpureus subsp. purpureus	unknown	unknown	unknown	110	green	brown	green	green	white	flat and long	5.18	2.22	5.15	2	11.412	7.884	5.098	3.5	III	IV	A
266	374	14485								K 781066E	ILRI	cultivated	Lablab purpureus subsp. purpureus	unknown	unknown	unknown	112	-	brown	green	green	white	Not available	5.14	1.94	5.52	2.04	10.608	7.288	3.554	3.8	III	IV	A
267	375	14486								K 77307C	ILRI	cultivated	Lablab purpureus subsp. purpureus	unknown	unknown	unknown	85	green	brown	green	green	purple	flat and long	4.94	2.1	5	2	11.86	8.03	4.754	3.6	III	IV	A
268	376	14487								K 78392A	ILRI	cultivated	Lablab purpureus subsp. purpureus	unknown	unknown	unknown	87	green	brown	green	green	Not available	flat and long	4.8	1.98	4.38	1.86	11.214	7.85	4.986	3	III	IV	A
269	377	14488								K 77547B	ILRI	cultivated	Lablab purpureus subsp. purpureus	unknown	unknown	unknown	107	green	brown	green	green	white	flat and long	4.98	2.1	5.5	2.1	10.9625	7.735	5.1875	4	III	IV	A
270	378	14489								K 78393	ILRI	cultivated	Lablab purpureus subsp. purpureus	unknown	unknown	unknown	110	green	brown	green	green	white	flat and long	5.14	2.08	5.36	2	10.57	8.178	5.018	4	III	IV	A
271	379	14490								K 78239C	ILRI	cultivated	Lablab purpureus subsp. purpureus	unknown	unknown	unknown	110	green	brown	green	green	white	flat and long	5.1	2.2	5.3	2.18	11.244	8.072	5.012	4	III	IV	A
272	380	14492								K 54212	ILRI	cultivated	Lablab purpureus subsp. purpureus	unknown	unknown	unknown	111	green	brown	green	green	white	flat and long	4.94	2.22	4.96	2	11.412	7.712	4.97	3.8	III	IV	A
273	381-1	14493								K 68129A	ILRI	cultivated	Lablab purpureus subsp. purpureus	unknown	unknown	unknown	65	green	brown	green	green	purple	flat and long	4.78	2.06	4.84	2.08	11.324	7.852	4.43	2.2	II	IV	A
274	381-2	14493								K 68129A	ILRI	cultivated	Lablab purpureus subsp. purpureus	unknown	unknown	unknown	99	green	brown	green	green	white	flat and long	5.02	2.1	4.2	1.8	10.342	7.332	4.672	2.33333	II	IV	A
275	382	14550			24973	17189					ILRI	cultivated	Lablab purpureus subsp. purpureus	Zimbabwe	Africa	South	95	green	brown	green	green	white	flat and long	4.8	2.08	5.8	2.1	11.75	7.828	4.022	4	II	IV	A
276	383	14551			30702	22651		14551			ILRI	cultivated	Lablab purpureus subsp. purpureus	Myanmar	Asia	Southeast	-	-	-	green	green	Not available	Not available	Not available	Not available	Not available	Not available	Not available	Not available	Not available	Not available	II	IV	A
278	385-2	14896					TLN-1	14896		Bangalore-1	ILRI	cultivated	Lablab purpureus subsp. purpureus	India	Asia	South	89	green	brown	green	green	white	flat and long	5.6	2.04	5.78	1.9	10.394	8.354	5.902	3.8	II	IV	A
279	386	14901					TLn 10			US67-24	ILRI	cultivated	Lablab purpureus subsp. purpureus	India	Asia	South	82	green	brown	green	green	purple	flat and long	5.9	2.08	6.15	2	10.366	7.834	4.516	5	II	IV	A
281	388	14903			CQ3621		TLN-12	14903		US67-29, CQ3621, 67-13, AusTRCF 309489	ILRI	cultivated	Lablab purpureus subsp. purpureus	India	Asia	South	81	green	brown	green	green	white	flat and long	4.94	1.94	5.16	1.98	11.238	7.704	4.67	3.4	II	IV	A
282	389-1	14904	50470				TLn 13			US67-30, AusTRCF 309490	ILRI	cultivated	Lablab purpureus subsp. purpureus	India	Asia	South	83	green	brown	green	green	purple	flat and long	4.84	2.16	5.98	2.02	11.112	8.128	5.728	4	II	IV	A
283	389-2	14904	50470				TLn 13			US67-30, AusTRCF 309490	ILRI	cultivated	Lablab purpureus subsp. purpureus	India	Asia	South	85	green	brown	green	green	white	flat and long	5.64	2.36	5.7	2.2	10.86	7.63	5.36	3.8	II	IV	A
284	389-3	14904	50470				TLn 13			US67-30, AusTRCF 309490	ILRI	cultivated	Lablab purpureus subsp. purpureus	India	Asia	South	-	-	-	Not available	Not available	Not available	Not available	5	2	4.52	1.88	11.1	8.13	5.438	3	II	IV	A
285	390-1	14905					TLN-14	14905		US67-32, 67-24, AusTRCF 309491	ILRI	cultivated	Lablab purpureus subsp. purpureus	India	Asia	South	-	green	brown	green	green	white	flat and long	6.14	1.6	6.9	1.56667	Not available	Not available	Not available	4	II	IV	A
286	390-2	14905					TLN-14	14905		US67-32, 67-24, AusTRCF 309491	ILRI	cultivated	Lablab purpureus subsp. purpureus	India	Asia	South	56	green	brown	green	green	white	flat and long	6.34	2.14	5.78	2	10.498	7.216	4.608	4	II	IV	A
287	391-1	14906					TLN-15	14906		US67-33, 67-25	ILRI	cultivated	Lablab purpureus subsp. purpureus	India	Asia	South	-	green	brown	green	green	white	flat and long	Not available	Not available	5.02	1.96	11.152	7.36	5.118	3.6	II	IV	A
289	392	14907					TLN-18	14907		US67-49, 67-30	ILRI	cultivated	Lablab purpureus subsp. purpureus	India	Asia	South	77	green	brown	green	green	white	flat and long	4.76	1.98	4.8	1.96	11.108	7.234	4.852	3.2	II	IV	A
290	393	14911					TLn 28				ILRI	cultivated	Lablab purpureus subsp. purpureus	India	Asia	South	78	green	brown	green	green	purple	flat and long	4.74	1.98	4.68	1.82	9.69	6.692	3.768	4	II	IV	A
291	394	14914					TLn 31				ILRI	cultivated	Lablab purpureus subsp. purpureus	unknown	unknown	unknown	53	green	brown	Not available	green	purple	flat and long	5	2	4.48	1.74	9.004	6.57	3.704	3	II	IV	A
292	395	15436								FAO 65551	ILRI	cultivated	Lablab purpureus subsp. purpureus	unknown	unknown	unknown	129	-	brown	Not available	Not available	Not available	Not available	5.08	2.14	4.88	2.36	11.97	7.876	4.472	3.2	II	IV	A
293	396	18600							639019	GL 4, GRIF 12293	ILRI	cultivated	Lablab purpureus subsp. purpureus	China	Asia	East	91	-	brown	Not available	Not available	Not available	Not available	8	2.28	7.16	2.18	11.408	8.236	4.524	4	II	IV	A
294	398	18602	50273						639277	GRIF 969, AusTRCF 309569	ILRI	cultivated	Lablab purpureus subsp. purpureus	China	Asia	East	100	-	brown	Not available	Not available	Not available	Not available	7.6	2.06	7.02	2.36	12.354	9.006	5.47	4.2	II	IV	A
295	399	18603						18603	164302	Machacotai	ILRI	cultivated	Lablab purpureus subsp. purpureus	Tamil Nadu, India	Asia	South	103	-	brown	Not available	Not available	Not available	Not available	5.3	2.1	5.28	2.02	11.446	8.424	5.036	3.6	III	IV	A
296	400	18604							183451		ILRI	cultivated	Lablab purpureus subsp. purpureus	India	Asia	South	107	green	brown	green	green	white	flat and long	4.84	2.16	4.78	2	11.252	7.63	4.71	3.4	II	IV	A
298	402	18607						18607	215752	Col no. 396	ILRI	cultivated	Lablab purpureus subsp. purpureus	Peru	America	South	76	green	brown	green	green	white	flat and long	4.7	1.68	5.28	2.12	12.098	8.06	4.456	3.6	II	IV	A
299	403	18609	50343						288466		ILRI	cultivated	Lablab purpureus subsp. purpureus	India	Asia	South	79	green	brown	green	green	white	flat and long	4.52	1.94	4.72	1.9	11.218	7.47	4.986	3.2	II	IV	A
300	404	18611						18611	337534	Col no. 225	ILRI	cultivated	Lablab purpureus subsp. purpureus	Argentina	America	South	112	purple	brown	purple	green	purple	flat and long	6.96	2.34	6.54	2.18	12.366	8.714	5.39	4.2	III	IV	A
302	407	18615						18615	345608	k 199	ILRI	cultivated	Lablab purpureus subsp. purpureus	Australia, (Former Soviet Union)	Australia	Australia	103	green	brown	green	green	white	flat and long	8	2.38	7.18	1.9	11.402	7.908	5.422	4.6	II	IV	A
304	409	18617						18617	346440	n/a	ILRI	cultivated	Lablab purpureus subsp. purpureus	USA	America	North	56	-	-	purple	purple	Not available	Not available	5.02	2.26	4.06	1.96	10	7.54	4.77	3.4	II	IV	A
305	410	18618							347629		ILRI	cultivated	Lablab purpureus subsp. purpureus	Ethiopia	Africa	East	151	-	brown	green	green	Not available	Not available	5.16	2.04	5.36	2.18	11.624	8.456	4.73	3.4	II	IV	A
307	413	18622							393501		ILRI	cultivated	Lablab purpureus subsp. purpureus	China	Asia	East	56	-	brown	purple	green	Not available	Not available	6.06	1.04	5.26	1.52	10.614	8.592	3.686	3.8	II	IV	A
308	414-2	18623						18623	416699	65 071 01080	ILRI	cultivated	Lablab purpureus subsp. purpureus	Iran	Asia	West	54	-	-	Not available	Not available	Not available	Not available	Not available	Not available	5.72	1.96	10.448	8.07	4.698	4.4	III	IV	A
309	415	18624						18624	419086	Tsi Pian	ILRI	cultivated	Lablab purpureus subsp. purpureus	Lu Ying Beijing, China	Asia	East	43	green	brown	green	green	white	flat and long	5.3	1.98	5.44	2.1	11.596	7.69	5.172	3.8	III	IV	A
310	416-1	18625						18625	439586	n/a	ILRI	cultivated	Lablab purpureus subsp. purpureus	Brazil	America	South	46	-	brown	green	green	purple	Not available	Not available	Not available	6.5	2.15	11.562	8.566	5.242	4	II	IV	A
311	416-2	18625						18625	439586	n/a	ILRI	cultivated	Lablab purpureus subsp. purpureus	Brazil	America	South	50	green	brown	green	green	purple	flat and long	5.24	2.18	5.74	2.2	10.55	6.595	3.13	3.4	II	IV	A
312	417	18626						18626	509114	Co. 7	ILRI	cultivated	Lablab purpureus subsp. purpureus	India	Asia	South	56	green	brown	green	green	white	flat and long	6.84	2.48	7.14	2.42	11.346	7.62	4.474	4.4	II	IV	A
313	419	18628						18628	555670	n/a	ILRI	cultivated	Lablab purpureus subsp. purpureus	China	Asia	East	99	green	brown	purple	green	purple	flat and long	6.54	2.74	5.52	2.4	14.18	9.154	5.866	3	II	IV	A
314	420	18629							596358	TIFT-1	ILRI	cultivated	Lablab purpureus subsp. purpureus	USA	America	North	60	green	brown	green	green	Not available	flat and long	5.34	1.92	5.12	1.68	8.992	6.918	4.362	4	II	IV	A
315	421	18630			57314	22607		18630	388017		ILRI	cultivated	Lablab purpureus subsp. purpureus	ex Egypt	Africa	North	128	-	brown	green	green	Not available	Not available	7.1	1.98	5.46	2.08	11.598	8.36	5.216	3.6	II	IV	A
316	422	18632				9902				FAO 32.948	ILRI	cultivated	Lablab purpureus subsp. purpureus	unknown	unknown	unknown	112	green	brown	green	green	white	flat and long	5.58	2.08	4.98	1.96	10.994	8.02	4.664	3.4	III	IV	A
318	424	18634				21542					ILRI	cultivated	Lablab purpureus subsp. purpureus	unknown	unknown	unknown	91	-	brown	green	green	purple	Not available	8.84	2.2	9.5	2.58	12.588	8.426	5.658	5.2	II	IV	A
319	425	18635				21602					ILRI	cultivated	Lablab purpureus subsp. purpureus	unknown	unknown	unknown	59	purple	brown	purple	green	purple	flat and long	5.76	2.12	6.42	2.4	11.676	8.52	4.95	4.2	II	IV	A
320	426-1	18636				21603		18636			ILRI	cultivated	Lablab purpureus subsp. purpureus	Peru	America	South	111	green	brown	green	green	white	flat and long	Not available	Not available	Not available	Not available	Not available	Not available	Not available	Not available	II	IV	A
321	426-2	18636				21603		18636			ILRI	cultivated	Lablab purpureus subsp. purpureus	Peru	America	South	103	green	brown	green	green	white	flat and long	5.74	2.26	5.6	2.1	12.1	8.236	4.946	3.6	II	IV	A
323	428	18592					TLN-2	18592		Bangalore-2	ILRI	cultivated	Lablab purpureus subsp. purpureus	India	Asia	South	59	green	brown	green	green	white	Not available	6.66	1.62	5.68	1.18	9.51	6.422	4.786	4.2	II	IV	A
324	429-1	18593			30211		TLN-5	18593	DL 231	DL-231	ILRI	cultivated	Lablab purpureus subsp. purpureus	India	Asia	South	67	green	brown	green	green	white	flat and long	4.52	1.78	5.48	2.16	11.964	7.748	4.448	3.6	II	IV	A
325	429-2	18593			30211		TLn 5	18593	DL 231	DL-231	ILRI	cultivated	Lablab purpureus subsp. purpureus	India	Asia	South	-	green	brown	green	green	white	flat and long	6.16667	2.3	5.33333	2.33333	12.105	7.7225	4.795	2.66667	II	IV	A
326	431-1	18595					TLN-9	18595		DL-2542	ILRI	cultivated	Lablab purpureus subsp. purpureus	India	Asia	South	60	green	brown	green	green	purple	flat and long	5.5	1.96	5.5	1.9	10.372	7.638	4.66	3.8	II	IV	A
331	434-1	18598					TLn 19				ILRI	cultivated	Lablab purpureus subsp. purpureus	India	Asia	South	-	green	brown	green	green	purple	flat and long	5.68	1.96	5.92	1.86	10.886	8.564	4.432	3.8	II	IV	A
332	434-2	18598					TLn 19				ILRI	cultivated	Lablab purpureus subsp. purpureus	India	Asia	South	50	green	brown	green	green	white	flat and long	4.78	1.74	4.76	1.84	10.506	7.592	4.996	3.8	II	IV	A
334	435-2	18599					TLN-21	18599		Red type, US 67-33	ILRI	cultivated	Lablab purpureus subsp. purpureus	India	Asia	South	97	green	brown	green	green	white	flat and long	5.94	1.96	5.7	1.56	9.798	7.29	4.402	3.8	II	IV	A
335	436	PK2018MO01										cultivated	Lablab purpureus (L.) Sweet	Myanmar	Asia	Southeast	131	-	brown	green	green	purple	Not available	10.56	2.3	8.4	2.1	Not available	Not available	Not available	3	II	IV	A
336	437	PK2018MO02										cultivated	Lablab purpureus (L.) Sweet	Myanmar	Asia	Southeast	150	-	-	purple	green	purple	Not available	5.2	1.73333	Not available	Not available	Not available	Not available	Not available	Not available	II	IV	A
337	438	PK2018MO03										cultivated	Lablab purpureus subsp. purpureus	Myanmar	Asia	Southeast	144	-	brown	purple	green	Not available	Not available	5.7	1.54	4.5	1.6	10.346	8.114	6.086	4	II	IV	A
338	440	9902								FAO-32.984	CIAT	cultivated	Lablab purpureus subsp. purpureus	unknown	unknown	unknown	107	green	brown	green	green	white	flat and long	5.34	2.06	5.36667	2	10.96	8.274	4.87	3.66667	III	IV	A
346	448	21660									CIAT	cultivated	Lablab purpureus subsp. purpureus	Ecuador	America	South	149	-	brown	green	green	Not available	Not available	4.98	1.72	4.62	1.76	11.55	8.098	4.892	2.8	II	IV	A
347	449	21685									CIAT	cultivated	Lablab purpureus (L.) Sweet	Honduras	America	North	-	-	-	green	green	Not available	Not available	Not available	Not available	Not available	Not available	Not available	Not available	Not available	Not available	II	IV	A
348	451	22184								OT-345	CIAT	cultivated	Lablab purpureus subsp. purpureus	Colombia	America	South	148	-	brown	green	green	Not available	Not available	Not available	Not available	5.9	2.1	10.288	7.248	6.098	4.5	II	IV	A
349	452	22517			34776	22517		24761	PI 388002		CIAT	cultivated	Lablab purpureus subsp. purpureus	India	Asia	South	119	green	-	green	green	white	flat and long	4.6	1.86	Not available	Not available	Not available	Not available	Not available	Not available	II	IV	A
350	453	22518			36019	22518		24769		Grif 16520, USA126,	CIAT	cultivated	Lablab purpureus subsp. purpureus	Hungary	Europe	Europe	61	green	brown	green	green	purple	flat and long	6.04	2.2	5.84	2.1	11.118	7.602	4.728	4.2	II	IV	A
351	454	22597			34775	22597		24760			CIAT	cultivated	Lablab purpureus subsp. purpureus	India	Asia	South	56	green	brown	green	green	white	flat and long	9.64	3.14	6.56	1.62	11.422	8.612	5.074	3.2	II	IV	A
352	455	22598	APG 50351	VI055306	34777	22598		11617	388003		CIAT	cultivated	Lablab purpureus subsp. purpureus	India	Asia	South	60	green	brown	green	green	white	flat and long	4.3	1.62	5.44	1.94	11.612	7.922	4.268	4	II	IV	A
353	456	22599	APG 50377		52513	22599		24780		IBS433	CIAT	cultivated	Lablab purpureus subsp. purpureus	Zambia	Africa	South	53	green	brown	green	green	white	flat and long	5.18	1.46	5.3	1.62	11.202	8.002	4.842	4	II	IV	A
355	459	22602	50386		52525			21055		IBS 896, AusTRCF 52525	CIAT	cultivated	Lablab purpureus subsp. purpureus	India	Asia	South	53	green	brown	green	green	white	flat and long	5.5	1.9	4.96	1.7	10.854	8.21	5.284	2.6	II	IV	A
356	460	22603	50387		52526			21056		IBS 857, AusTRCF 52526	CIAT	cultivated	Lablab purpureus subsp. purpureus	India	Asia	South	98	-	-	green	green	Not available	Not available	Not available	Not available	Not available	Not available	Not available	Not available	Not available	Not available	II	IV	A
360	464-1	22609	50434	VI058796	76998	22609		21085		AusTRCF 76998, MM 575	CIAT	cultivated	Lablab purpureus subsp. purpureus	Zambia	Africa	South	108	green	-	green	green	purple	flat and long	Not available	Not available	4.96	1.88	Not available	Not available	Not available	3.6	II	IV	A
361	464-2	22609	50434	VI058796	76998	22609		21085		AusTRCF 76998, MM 575	CIAT	cultivated	Lablab purpureus subsp. purpureus	Zambia	Africa	South	108	green	brown	green	green	white	flat and long	5.06	2.02	4.36	1.84	10.982	7.782	4.72	4	II	IV	A
362	465	22648	50450		106494	22648		21032		IBS 3773, AusTRCF 106494	CIAT	cultivated	Lablab purpureus subsp. purpureus	India	Asia	South	94	-	brown	green	green	Not available	Not available	5.4	1.56	7.66667	1.56667	6.898	5.854	2.582	4.66667	II	IV	A
363	466	22649		VI055312	106548	22649		21034			CIAT	cultivated	Lablab purpureus subsp. purpureus	India	Asia	South	87	green	brown	green	green	white	flat and long	7.3	1.5	4.78	1.48	9.534	7.434	5.836	4	III	IV	A
364	467	22651			30702	22651		14551			CIAT	cultivated	Lablab purpureus (L.) Sweet	Myanmar	Asia	Southeast	-	-	-	green	green	Not available	Not available	Not available	Not available	Not available	Not available	Not available	Not available	Not available	Not available	II	IV	A
365	469	22653	50362	VI059429	36903	22653		21044	388012	AusTRCF 36903	CIAT	cultivated	Lablab purpureus subsp. purpureus	Russia	Europe	Europe	76	green	brown	green	green	purple	flat and long	4.62	1.9	5.04	1.98	10.258	7.05	4.266	3.8	II	IV	A
367	471	22655		VI055314	52508	22655		21049			CIAT	cultivated	Lablab purpureus subsp. purpureus	Angola	Africa	Central	69	green	brown	green	green	white	flat and long	5.32	1.9	5.24	1.54	9.94	7.584	4.69	3.8	II	IV	A
368	473	22657		VI055307	81626	22657		21086			CIAT	cultivated	Lablab purpureus subsp. bengalensis	India	Asia	South	59	green	-	green	green	Not available	round and long	7.74	1.66	8.04	1.14	11.918	6.854	5.934	4.8	II	IV	A
369	474	22658	50438	VI059419	96924	22658		21087			CIAT	cultivated	Lablab purpureus subsp. purpureus	China	Asia	East	43	-	-	green	green	Not available	Not available	7.84	2.42	7.9	2.38	13.784	9.962	5.174	4	II	IV	A
370	475	22660	50305	VI058797	30212	22660		147	401553, 387994	DL-2542, Highworth, Q 6059	CIAT	cultivated	Lablab purpureus subsp. purpureus	unknown	unknown	unknown	97	green	brown	green	green	purple	flat and long	4.66	2.14	4.7	2.13333	11.998	8.08	4.282	3	III	IV	A
371	476	22661								LOT-828, LOT-846, KOALA	CIAT	cultivated	Lablab purpureus subsp. purpureus	unknown	unknown	unknown	43	green	brown	green	green	purple	flat and long	4.96	2.28	5.12	2.02	10.228	7.298	4.334	4	II	IV	A
372	477	22665	50411		52520			21076, 21050			CIAT	cultivated	Lablab purpureus (L.) Sweet	India	Asia	South	-	-	-	green	green	Not available	Not available	Not available	Not available	Not available	Not available	Not available	Not available	Not available	Not available	II	IV	A
373	478	22674			29400			24753, 11640			CIAT	cultivated	Lablab purpureus subsp. purpureus	Indonesia	Asia	Southeast	68	green	brown	green	green	white	flat and long	5.28	2.06	3.1	1.15	6.078	4.722	3.14	3	II	IV	A
374	479	22675	50266		29803	22675		24754, 11619		N 82497	CIAT	cultivated	Lablab purpureus subsp. bengalensis	India	Asia	South	62	green	brown	green	green	purple	round and long	6.78	1.58	6.46	1.18	10.45	7.336	5.906	3.8	II	IV	A
375	480	22677			30213	22677		24755	316575		CIAT	cultivated	Lablab purpureus subsp. purpureus	India	Asia	South	107	green	brown	green	green	white	flat and long	4.98	2.14	4.24	1.7	10.696	7.506	5.288	3.8	III	IV	A
376	481	22678			34772	22678		24757			CIAT	cultivated	Lablab purpureus subsp. bengalensis	India	Asia	South	62	green	brown	green	green	white	round and long	9.18	1.3	7.4	1.02	11.914	7.05	5.874	4.2	II	IV	A
377	482	22679			34773	22679		24758			CIAT	cultivated	Lablab purpureus subsp. purpureus	India	Asia	South	56	green	brown	green	green	white	flat and long	7	1.96	5.63333	1.53333	10.94	7.83	4.672	2.33333	II	IV	A
378	483	22683			34780	22683		24764	388006		CIAT	cultivated	Lablab purpureus subsp. purpureus	India	Asia	South	52	green	brown	green	green	purple	flat and long	6.28	2.16	6.74	1.94	10.654	8.004	5.304	4.8	II	IV	A
379	484	22684			34781	22684		24765			CIAT	cultivated	Lablab purpureus subsp. purpureus	India	Asia	South	108	green	brown	green	green	white	flat and long	5.08	2.16	5.04	2.06	11.832	8.348	5.254	3.2	III	IV	A
380	485	22689			38705	22689		24770			CIAT	cultivated	Lablab purpureus subsp. purpureus	China	Asia	East	102	green	brown	green	green	white	flat and long	4.92	2.22	5.12	2.02	11.13	8.07	5.158	3.4	III	IV	A
381	486	22690			40167	22690		24772			CIAT	cultivated	Lablab purpureus subsp. purpureus	Brazil	America	South	-	-	-	green	green	Not available	Not available	4.76667	2.03333	Not available	Not available	Not available	Not available	Not available	Not available	II	IV	A
383	490	22698			52507A	22698		24777			CIAT	cultivated	Lablab purpureus subsp. purpureus	Angola	Africa	Central	132	-	-	green	green	white	Not available	5.9	2.2	Not available	Not available	Not available	Not available	Not available	Not available	II	IV	A
384	491	22699			81364	22699		24801			CIAT	cultivated	Lablab purpureus subsp. purpureus	ex USA	America	North	69	green	brown	green	green	white	flat and long	5.34	2.1	5.26	1.86	10.304	7.736	4.58	3.2	II	IV	A
385	492	22703			52530	22703		24786			CIAT	cultivated	Lablab purpureus subsp. purpureus	India	Asia	South	96	green	brown	green	green	white	flat and long	5.06	1.94	4.88	2.02	11.38	7.74	4.698	3.2	II	IV	A
386	493	22704			52531	22704		24787			CIAT	cultivated	Lablab purpureus subsp. purpureus	India	Asia	South	77	green	brown	green	green	white	flat and long	4.2	1.56	5.06	1.96	10.752	7.322	4.44	4	II	IV	A
387	494	22705			52532	22705		24788			CIAT	cultivated	Lablab purpureus subsp. purpureus	India	Asia	South	112	-	brown	green	green	white	Not available	5.05	1.85	5.36	2.02	10.906	7.21	4.332	4	II	IV	A
388	495	22706			52542						CIAT	cultivated	Lablab purpureus subsp. purpureus	unknown	unknown	unknown	72	-	brown	green	green	white	Not available	Not available	Not available	5.78	1.42	10.438	7.712	4.744	3.6	II	IV	A
389	496	22708			52546						CIAT	cultivated	Lablab purpureus subsp. purpureus	unknown	unknown	unknown	99	green	brown	green	green	white	flat and long	4.96	2.24	5.4	1.98	10.472	7.364	4.902	4.2	II	IV	A
390	497	22711			52552	22711		24791			CIAT	cultivated	Lablab purpureus subsp. purpureus	India	Asia	South	80	-	-	green	green	white	Not available	Not available	Not available	Not available	Not available	Not available	Not available	Not available	Not available	II	IV	A
391	499	22714			58637	22714					CIAT	cultivated	Lablab purpureus subsp. purpureus	Colombia	America	South	96	green	brown	green	green	Not available	flat and long	5.36	2.14	5.92	2.02	10.004	7.49	5.142	4	II	IV	A
392	500	22717									CIAT	cultivated	Lablab purpureus subsp. purpureus	unknown	unknown	unknown	114	-	brown	purple	green	white	Not available	Not available	Not available	6.82	2.22	11.362	8.34	5.476	4.2	II	IV	A
393	503	22750								CQ-3632	CIAT	cultivated	Lablab purpureus subsp. purpureus	ex South Africa	Africa	South	88	green	brown	green	green	purple	flat and long	4.64	2.22	5.26	2.04	11.824	8.476	5.048	3.4	III	IV	A
394	504	22754				22754		24823*		CQ-3636	CIAT	cultivated	Lablab purpureus subsp. bengalensis	ex Australia	Australia	Australia	113	-	brown	green	green	purple	Not available	9.7	3.08	9.36	2.64	12.452	8.54	5.496	5	II	IV	A
395	505	22757			P5310			24824		P-5310	CIAT	cultivated	Lablab purpureus subsp. bengalensis	unknown	unknown	unknown	62	green	brown	green	green	purple	round and long	7.22	1.48	6.46	1.18	10.728	7.15	5.926	4.8	II	IV	A
398	508	22721			91735	22721		24802			CIAT	cultivated	Lablab purpureus subsp. purpureus	India	Asia	South	88	green	brown	green	green	white	flat and long	3.9	2.04	5.3	2.1	11.624	7.34	3.726	3.6	II	IV	A
399	509	22722			96950	22722		24803			CIAT	cultivated	Lablab purpureus subsp. purpureus	Indonesia	Asia	Southeast	78	green	brown	green	green	white	flat and long	4.82	2.18	5.84	1.98	10.98	7.93	4.636	4.2	II	IV	A
400	510	22725			103821	22725		24744			CIAT	cultivated	Lablab purpureus subsp. purpureus	Sudan	Africa	East	112	green	brown	green	green	white	Not available	5.1	1.76667	4.94	1.98	11.272	7.644	4.086	3.2	II	IV	A
401	511	22726			103822	22726		24745	666237		CIAT	cultivated	Lablab purpureus subsp. purpureus	Sudan	Africa	East	95	green	brown	green	green	white	flat and long	4.62	2.26	4.34	1.94	11.95	7.486	4.746	3.2	II	IV	A
403	513	22730								Q-5427	CIAT	cultivated	Lablab purpureus subsp. bengalensis	ex Australia	Australia	Australia	81	green	brown	green	green	purple	round and long	7.26	1.38	7.08	1.24	10.526	7.458	6.026	5	II	IV	A
404	514	22731								Q-6880B	CIAT	cultivated	Lablab purpureus subsp. purpureus	unknown	unknown	unknown	43	green	brown	green	green	Not available	flat and long	4.76	2.18	4.58	1.8	10.83	7.928	4.678	4	II	IV	A
405	515	22732								Q-6988	CIAT	cultivated	Lablab purpureus subsp. purpureus	Brazil	America	South	67	green	brown	green	green	white	flat and long	4.64	2.02	5.3	1.94	9.618	7.598	4.716	4	II	IV	A
407	517	22736								CQ-3319	CIAT	cultivated	Lablab purpureus subsp. purpureus	unknown	unknown	unknown	133	-	brown	green	green	white	Not available	Not available	Not available	6.45	2.275	11.654	8.258	5.012	3.75	II	IV	A
408	518	22738								CQ-3603	CIAT	cultivated	Lablab purpureus subsp. purpureus	unknown	unknown	unknown	109	green	brown	green	green	white	flat and long	4.66	2.02	5.32	2.06	11.112	7.764	4.8	3.8	III	IV	A
409	520	22740						14903		CQ3621, TLN-12, 67-13	CIAT	cultivated	Lablab purpureus subsp. purpureus	India	Asia	South	52	green	brown	green	green	white	flat and long	5.36	2.12	5.7	2	10.422	7.206	4.82	3.8	II	IV	A
410	521	22742								CQ-3623	CIAT	cultivated	Lablab purpureus subsp. purpureus	unknown	unknown	unknown	89	green	brown	green	green	purple	flat and long	5.76	2.1	5.8	1.84	10.524	7.86	5.728	4.6	II	IV	A
411	522	22743								CQ-3624	CIAT	cultivated	Lablab purpureus subsp. purpureus	ex Malawi	Africa	East	126	-	brown	green	green	purple	Not available	10.44	3.18	9.42	2.52	12.03	8.46	4.988	4.6	II	IV	A
412	523	22744								CQ-3626	CIAT	cultivated	Lablab purpureus subsp. purpureus	ex South Africa	Africa	South	103	green	brown	green	green	white	flat and long	5.18	2.16	4.92	1.78	11.226	8.702	5.362	3.4	II	IV	A
413	524	22745								CQ-3627	CIAT	cultivated	Lablab purpureus (L.) Sweet	ex South Africa	Africa	South	-	-	-	green	green	Not available	Not available	Not available	Not available	Not available	Not available	Not available	Not available	Not available	Not available	II	IV	A
414	525	22761		VI058765		22761		11613			CIAT	cultivated	Lablab purpureus subsp. purpureus	ex Mali	Africa	West	110	-	brown	green	green	purple	round and long	10.5	2.6	9.2	2.38	12.09	8.398	5.596	5.2	II	IV	A
415	526	22766		VI055316		22766		14437			CIAT	cultivated	Lablab purpureus subsp. purpureus	Zimbabwe	Africa	South	130	-	-	green	green	purple	Not available	7.8	2.6	8.04	2.52	12.526	8.752	5.388	4	II	IV	A
416	527	22768		VI058766		22768		14442			CIAT	cultivated	Lablab purpureus subsp. purpureus	Sudan	Africa	East	108	green	brown	green	green	white	flat and long	4.64	2.14	5.5	2.2	12.536	8.342	4.79	3.33333	II	IV	A
418	529	32140									CIAT	cultivated	Lablab purpureus subsp. purpureus	unknown	unknown	unknown	98	green	brown	green	green	white	flat and long	5.3	2	5.32	1.88	11.698	9.32	5.628	4	II	IV	A
419	530	VI 033686								KHALO SIMI	AVRDC	cultivated	Lablab purpureus subsp. purpureus	Nepal	Asia	South	56	green	brown	purple	green	purple	flat and long	5.96	2.28	7.42	2.1	12.132	9.194	5.816	5	II	IV	A
420	531	VI 033689								SIMBI	AVRDC	cultivated	Lablab purpureus subsp. purpureus	Nepal	Asia	South	63	green	brown	green	green	white	flat and long	7.44	2.22	7.225	1.85	11.692	7.832	5.622	4.5	II	IV	A
421	532	VI 033696								BARAMASI SIMI	AVRDC	cultivated	Lablab purpureus subsp. purpureus	Nepal	Asia	South	55	green	brown	green	green	white	flat and long	7.94	2.46	5.9	1.86	8.83333	5.80333	2.58667	4	II	IV	A
422	533	VI 033742								PARDA	AVRDC	cultivated	Lablab purpureus subsp. purpureus	Philippines	Asia	Southeast	147	green with purple outer	brown	purple	green	purple	flat and long	Not available	Not available	10.22	1.94	11.5375	7.0925	3.445	5.2	II	IV	A
423	534	VI 033744									AVRDC	cultivated	Lablab purpureus subsp. purpureus	Philippines	Asia	Southeast	-	-	brown	purple	green	Not available	Not available	Not available	Not available	10.8	1.7	11.485	7.365	3.86	5	II	IV	A
424	535	VI 033745									AVRDC	cultivated	Lablab purpureus subsp. purpureus	Philippines	Asia	Southeast	151	green	brown	green	green	white	flat and long	9.7	2.08	9.68	1.68	6.56	5.28	2.61	4.6	II	IV	A
425	536	VI 033747									AVRDC	cultivated	Lablab purpureus subsp. purpureus	Philippines	Asia	Southeast	146	green with purple outer	brown	purple	green	purple	flat and long	10.44	2.26	10.06	2.06	9.38	6.194	2.896	4.8	II	IV	A
426	537	VI 033748									AVRDC	cultivated	Lablab purpureus subsp. purpureus	Philippines	Asia	Southeast	-	green	brown	green	green	white	flat and long	10.02	2	9.2	1.775	9.8075	6.0075	3.355	4	II	IV	A
427	538	VI 033750									AVRDC	cultivated	Lablab purpureus subsp. purpureus	Philippines	Asia	Southeast	114	green with purple outer	brown	purple	green	purple	flat and long	10.18	2.32	10.14	1.76	11.788	7.562	4.716	4.4	II	IV	A
428	539	VI 033752									AVRDC	cultivated	Lablab purpureus subsp. purpureus	Philippines	Asia	Southeast	130	green with purple outer	brown	purple	green	purple	flat and long	10.28	2.2	10	2	13.32	8.5525	5.71	4	II	IV	A
429	540	VI 033754									AVRDC	cultivated	Lablab purpureus subsp. purpureus	Philippines	Asia	Southeast	154	green with purple outer	brown	purple	green	purple	flat and long	10	2.02	9	2	12.7275	8.015	4.915	4	II	IV	A
430	541	VI 033756									AVRDC	cultivated	Lablab purpureus subsp. purpureus	Philippines	Asia	Southeast	-	green	brown	green	green	white	flat and long	9.2	2.1	8	1.6	11.78	7.62	4.87	4	II	IV	A
431	542	VI 033757									AVRDC	cultivated	Lablab purpureus subsp. purpureus	Philippines	Asia	Southeast	-	green	brown	green	green	white	flat and long	8.42	2.02	6	1.5	10.656	7.842	5.67	3	II	IV	A
432	543	VI 033761									AVRDC	cultivated	Lablab purpureus subsp. purpureus	Philippines	Asia	Southeast	114	-	brown	Not available	Not available	white	Not available	8.92	2.2	7.4	2	Not available	Not available	Not available	3	II	IV	A
433	544	VI 033763									AVRDC	cultivated	Lablab purpureus subsp. purpureus	Philippines	Asia	Southeast	113	green	brown	green	green	white	flat and long	9.9	1.98	9.8	1.78	8.2	6.09	3.0975	4.8	II	IV	A
434	545	VI 033766									AVRDC	cultivated	Lablab purpureus subsp. purpureus	Philippines	Asia	Southeast	111	green	brown	green	green	white	flat and long	10.66	2.3	8.76	1.66	6.6125	4.42	1.9225	4.8	II	IV	A
435	546	VI 033767									AVRDC	cultivated	Lablab purpureus subsp. purpureus	Philippines	Asia	Southeast	149	green	-	green	green	white	flat and long	10.2	2.44	8.84	2.08	11.04	8.082	5.396	4.4	II	IV	A
436	547	VI 033768									AVRDC	cultivated	Lablab purpureus subsp. purpureus	Philippines	Asia	Southeast	137	green	brown	green	green	white	flat and long	9.9	2	8	2	12.0933	8.78667	4.81667	3	II	IV	A
437	548	VI 033771									AVRDC	cultivated	Lablab purpureus subsp. purpureus	Philippines	Asia	Southeast	104	green with purple outer	brown	purple	green	purple	flat and long	7.76	2.06	7.96	1.8	11.918	8.04	5.268	4.8	II	IV	A
438	549	VI 034562									AVRDC	cultivated	Lablab purpureus subsp. purpureus	Malaysia	Asia	Southeast	96	green	brown	green	green	white	flat and long	7.58	2.22	6.44	1.94	11.672	8.168	4.64	4.2	II	IV	A
439	550	VI 036241								BATAO	AVRDC	cultivated	Lablab purpureus subsp. purpureus	Philippines	Asia	Southeast	109	green with purple outer	brown	purple	green	purple	flat and long	7.38	2.46	7.28	1.76	10.548	7.926	5.738	3.75	II	IV	A
440	551	VI 036242								BATAO	AVRDC	cultivated	Lablab purpureus subsp. purpureus	Philippines	Asia	Southeast	104	green with purple outer	brown	purple	green	purple	flat and long	7.28	1.88	7.98	1.82	11.924	8.518	5.078	4.2	II	IV	A
441	552	VI 036245									AVRDC	cultivated	Lablab purpureus subsp. purpureus	Philippines	Asia	Southeast	109	green	brown	green	green	white	flat and long	9.14	2.12	9.4	1.92	9.846	6.868	3.642	4	II	IV	A
442	553	VI 036247									AVRDC	cultivated	Lablab purpureus subsp. purpureus	Philippines	Asia	Southeast	-	green with purple outer	-	purple	green	purple	flat and long	Not available	Not available	Not available	Not available	Not available	Not available	Not available	Not available	II	IV	A
443	554	VI 041665									AVRDC	cultivated	Lablab purpureus subsp. purpureus	Philippines	Asia	Southeast	89	green with purple outer	brown	purple	green	purple	flat and long	7.42	1.88	6.66	1.42	10.422	7.736	4.496	4.6	II	IV	A
444	555	VI 043319									AVRDC	cultivated	Lablab purpureus subsp. bengalensis	Indonesia	Asia	Southeast	124	-	-	green	green	white	Not available	Not available	Not available	7.78	1.06	9.64	4.5	3.08	3.6	II	IV	A
445	556	VI 043321									AVRDC	cultivated	Lablab purpureus subsp. purpureus	Indonesia	Asia	Southeast	66	green with purple outer	brown	purple	green	purple	flat and long	7.54	2.28	7.46	1.96	10.092	7.498	5.31	4.8	II	IV	A
446	557	VI 046639								DAU VAN	AVRDC	cultivated	Lablab purpureus subsp. purpureus	Viet Nam	Asia	Southeast	65	green with purple outer	brown	purple	green	purple	flat and long	7.55	2.2	6.64	1.76	10.52	8.562	5.198	5	II	IV	A
447	558	VI 047210								MAK PEP-KAO	AVRDC	cultivated	Lablab purpureus subsp. bengalensis	Lao	Asia	Southeast	149	green	-	green	green	white	round and long	Not available	Not available	Not available	Not available	Not available	Not available	Not available	Not available	II	IV	A
448	559	VI 047215-A								MAK PEP-LE	AVRDC	cultivated	Lablab purpureus subsp. purpureus	Lao	Asia	Southeast	113	green with purple outer	brown	purple	green	purple	flat and long	5.68	2.08	6.98	2.36	10.868	7.828	5.53	4.6	II	IV	A
450	561	VI 047513								-	AVRDC	cultivated	Lablab purpureus (L.) Sweet	Bangladesh	Asia	South	123	-	-	purple	green	Not available	Not available	7.2	1.5	8.54	6.4	13.906	9.968	5.07	3.6	II	IV	A
451	562	VI 047684								SHIME	AVRDC	cultivated	Lablab purpureus subsp. purpureus	Bangladesh	Asia	South	-	-	-	purple	green	Not available	Not available	Not available	Not available	9.92	1.88	10.108	7.768	4.746	3.8	II	IV	A
453	564	VI 047862-A								SHEEM	AVRDC	cultivated	Lablab purpureus (L.) Sweet	Bangladesh	Asia	South	148	-	-	green	green	Not available	Not available	Not available	Not available	Not available	Not available	Not available	Not available	Not available	Not available	II	IV	A
454	565	VI 048026								DESHI SHEEM	AVRDC	cultivated	Lablab purpureus subsp. purpureus	Bangladesh	Asia	South	73	green with purple outer	-	purple	green	purple	flat and long	Not available	Not available	6.46667	1.83333	Not available	Not available	Not available	3.66667	II	IV	A
455	566	VI 048064								KARTIKA SHEEM	AVRDC	cultivated	Lablab purpureus subsp. purpureus	Bangladesh	Asia	South	150	green with purple outer	-	purple	green	purple	flat and long	7.25	2.1	5.96	1.88	Not available	Not available	Not available	2.2	II	IV	A
456	567	VI 048131								DESHI CHAI	AVRDC	cultivated	Lablab purpureus (L.) Sweet	Bangladesh	Asia	South	-	-	-	purple	green	Not available	Not available	Not available	Not available	Not available	Not available	Not available	Not available	Not available	Not available	II	IV	A
457	568	VI 048176								DESHI SHEEM	AVRDC	cultivated	Lablab purpureus (L.) Sweet	Bangladesh	Asia	South	-	-	-	purple	green	Not available	Not available	Not available	Not available	Not available	Not available	Not available	Not available	Not available	Not available	II	IV	A
459	570	VI 048595								-	AVRDC	cultivated	Lablab purpureus subsp. purpureus	Taiwan	Asia	East	43	purple	-	purple	purple	purple	round, short	6.125	1.875	5.38	1.5	Not available	Not available	Not available	2.8	II	IV	A
460	571	VI 054751								PD-12	AVRDC	cultivated	Lablab purpureus subsp. purpureus	India	Asia	South	47	green	-	green	green	white	round and long	11.7	2.1	10.64	1.74	11.1833	7.27667	5.03667	4.4	II	IV	A
461	572	VI 054753								PER-12	AVRDC	cultivated	Lablab purpureus (L.) Sweet	India	Asia	South	-	green with purple outer	-	purple	green	purple	flat and long	Not available	Not available	Not available	Not available	Not available	Not available	Not available	Not available	II	IV	A
462	573	VI 054754								V-10	AVRDC	cultivated	Lablab purpureus subsp. purpureus	India	Asia	South	97	green	brown	green	green	white	flat and long	10.64	2.06	10.24	1.9	Not available	Not available	Not available	4.8	II	IV	A
463	574	VI 054755								IL-41089	AVRDC	cultivated	Lablab purpureus subsp. purpureus	India	Asia	South	59	green	brown	green	green	white	round and long	7.54	2.02	7.22	1.5	11.165	8.03	4.89	4.4	II	IV	A
464	575	VI 054849								MAK PEP	AVRDC	cultivated	Lablab purpureus subsp. purpureus	Lao	Asia	Southeast	113	green	-	green	green	purple	flat and long	5.1	1.83333	9.72	1.68	Not available	Not available	Not available	4	II	IV	A
465	576	VI 054851								MAK PEH	AVRDC	cultivated	Lablab purpureus (L.) Sweet	Lao	Asia	Southeast	-	-	-	green	green	Not available	Not available	Not available	Not available	Not available	Not available	Not available	Not available	Not available	Not available	II	IV	A
466	577	VI 054852								MAK PEP	AVRDC	cultivated	Lablab purpureus subsp. purpureus	Lao	Asia	Southeast	-	green	brown	green	green	white	round, short	Not available	Not available	4.8	1.7	10.2333	7.89333	5.58	4	II	IV	A
467	578	VI 055040								-	AVRDC	cultivated	Lablab purpureus subsp. purpureus	Malaysia	Asia	Southeast	81	green	brown	green	green	white	flat and long	6.9	2.26	8.44	2.08	11.152	7.714	5.606	5.8	II	IV	A
468	579	VI 055218								KACANG SEPAT HIJAU	AVRDC	cultivated	Lablab purpureus subsp. purpureus	Malaysia	Asia	Southeast	81	green	brown	green	green	white	round and long	6.66	2.12	6.7	1.94	9.94	7.16	4.56	4.6	II	IV	A
469	580	VI 055503-A								-	AVRDC	cultivated	Lablab purpureus subsp. purpureus	Cambodia	Asia	Southeast	56	green	brown	green	green	white	flat and long	4.72	1.68	4.02	1.44	9.836	8.404	6.106	3.4	II	IV	A
470	581	VI 055503-B								-	AVRDC	cultivated	Lablab purpureus subsp. purpureus	Cambodia	Asia	Southeast	110	green	brown	green	green	purple	flat and long	5.14	2.18	4.66	1.64	10.436	8.104	5.082	3.6	II	IV	A
472	583	VI 055734								MAK PEP	AVRDC	cultivated	Lablab purpureus subsp. bengalensis	Lao	Asia	Southeast	110	green	brown	green	green	white	round and long	Not available	Not available	7.54	1.04	11.48	6.778	5.982	4.4	II	IV	A
473	585	VI 055928								MAK PEP	AVRDC	cultivated	Lablab purpureus subsp. purpureus	Lao	Asia	Southeast	101	green	brown	green	green	purple	flat and long	8.14	2.38	7.98	2.12	12.972	8.524	5.572	5	II	IV	A
474	586	VI 056060									AVRDC	cultivated	Lablab purpureus subsp. purpureus	Cambodia	Asia	Southeast	82	green	brown	green	green	white	flat and long	7.32	2.32	7.08	2.2	11.39	7.448	4.726	4.8	II	IV	A
475	587	VI 056099									AVRDC	cultivated	Lablab purpureus subsp. purpureus	Cambodia	Asia	Southeast	65	green	brown	green	green	white	round and long	9.02	2.08	8.72	1.72	10.528	7.606	5.12	4.8	II	IV	A
476	588	VI 056658									AVRDC	cultivated	Lablab purpureus subsp. bengalensis	Bangladesh	Asia	South	114	green with purple outer	brown	purple	green	purple	round and long	10.4	1.28	5.86	0.88	Not available	Not available	Not available	4.4	II	IV	A
477	589	VI 056666									AVRDC	cultivated	Lablab purpureus subsp. bengalensis	Bangladesh	Asia	South	113	green	-	green	green	white	round and long	Not available	Not available	Not available	Not available	Not available	Not available	Not available	Not available	II	IV	A
478	590	VI 056668									AVRDC	cultivated	Lablab purpureus subsp. bengalensis	Bangladesh	Asia	South	-	green	brown	green	green	white	round and long	11.7	1.34	9.2	1.02	12.922	7.21	6.494	4.4	II	IV	A
479	591	VI 056674									AVRDC	cultivated	Lablab purpureus (L.) Sweet	Bangladesh	Asia	South	-	-	-	green	green	Not available	Not available	Not available	Not available	Not available	Not available	Not available	Not available	Not available	Not available	II	IV	A
480	592	VI 056677									AVRDC	cultivated	Lablab purpureus (L.) Sweet	Bangladesh	Asia	South	-	-	-	green	green	Not available	Not available	Not available	Not available	Not available	Not available	Not available	Not available	Not available	Not available	II	IV	A
481	593	VI 056680									AVRDC	cultivated	Lablab purpureus subsp. bengalensis	Bangladesh	Asia	South	-	-	-	green	green	white	Not available	Not available	Not available	Not available	Not available	Not available	Not available	Not available	Not available	II	IV	A
482	594	VI 056683									AVRDC	cultivated	Lablab purpureus (L.) Sweet	Bangladesh	Asia	South	113	-	-	purple	green	purple	Not available	Not available	Not available	Not available	Not available	Not available	Not available	Not available	Not available	II	IV	A
483	595	VI 056685									AVRDC	cultivated	Lablab purpureus (L.) Sweet	Bangladesh	Asia	South	132	-	-	green	green	Not available	Not available	11.7	1.16	Not available	Not available	Not available	Not available	Not available	Not available	II	IV	A
485	597	VI 056689									AVRDC	cultivated	Lablab purpureus (L.) Sweet	Bangladesh	Asia	South	147	green	-	green	green	purple	round and long	10.94	1.08	Not available	Not available	Not available	Not available	Not available	Not available	II	IV	A
488	600	VI 056704									AVRDC	cultivated	Lablab purpureus (L.) Sweet	Bangladesh	Asia	South	109	green	-	green	green	purple	flat and long	Not available	Not available	Not available	Not available	Not available	Not available	Not available	Not available	II	IV	A
489	601	VI 056707									AVRDC	cultivated	Lablab purpureus (L.) Sweet	Bangladesh	Asia	South	-	-	-	purple	green	Not available	Not available	Not available	Not available	Not available	Not available	Not available	Not available	Not available	Not available	II	IV	A
490	602	VI 056711									AVRDC	cultivated	Lablab purpureus (L.) Sweet	Bangladesh	Asia	South	-	green	-	green	green	purple	round and long	Not available	Not available	Not available	Not available	Not available	Not available	Not available	Not available	II	IV	A
491	603	VI 056715									AVRDC	cultivated	Lablab purpureus (L.) Sweet	Bangladesh	Asia	South	-	-	-	green	green	Not available	Not available	Not available	Not available	Not available	Not available	Not available	Not available	Not available	Not available	II	IV	A
492	604	VI 056717									AVRDC	cultivated	Lablab purpureus (L.) Sweet	Bangladesh	Asia	South	-	-	-	purple	green	purple	Not available	8.25	3.3	9.96	4	12.496	8.66	5.386	4.2	II	IV	A
493	605	VI 056727									AVRDC	cultivated	Lablab purpureus subsp. purpureus	Bangladesh	Asia	South	79	green with purple outer	brown	purple	green	purple	flat and long	6.64	2.26	6.64	1.88	10.874	8.072	5.01	4.2	II	IV	A
494	606	VI 056731									AVRDC	cultivated	Lablab purpureus subsp. purpureus	Bangladesh	Asia	South	135	green	-	purple	green	purple	flat and long	8.1	2.3	Not available	Not available	Not available	Not available	Not available	Not available	II	IV	A
495	607	VI 056733									AVRDC	cultivated	Lablab purpureus subsp. bengalensis	Bangladesh	Asia	South	-	green	-	green	green	white	round and long	12.5	1.18	Not available	Not available	Not available	Not available	Not available	Not available	II	IV	A
496	610	VI 056747									AVRDC	cultivated	Lablab purpureus subsp. purpureus	Bangladesh	Asia	South	77	green	-	green	green	purple	round and long	8.3	1.52	Not available	Not available	Not available	Not available	Not available	Not available	II	IV	A
497	611	VI 057087									AVRDC	cultivated	Lablab purpureus subsp. purpureus	Cambodia	Asia	Southeast	43	green	brown	green	green	white	flat and long	5.42	2.08	4.44	1.58	11.452	8.196	5.894	4	II	IV	A
7	9	NI 218									Meise Botanic Garden	wild(4)	Lablab purpureus subsp. NN	Congo	Africa	Central	149	green	brown	purple	green	Not available	flat and long	3	1	4.35	1.5	5.536	4.646	2.754	4	I	I	B
57	99	APG 50425			60216					RWS 191, AusTRCF 60216	APG	wild(4)	Lablab purpureus subsp. NN	Uganda	Africa	East	136	green	brown	purple	green	purple	flat and long	3.25	1.35	3.54	1.24	6.458	4.922	2.87	3	I	I	B
142	191	APG 50299								Q25409, AusTRCF 320825	APG	wild(4)	Lablab purpureus subsp. NN	Australia	Australia	Australia	-	-	-	purple	green	Not available	Not available	5.2	0.3	Not available	Not available	Not available	Not available	Not available	4	I	I	B
190	240	APG 50262			28701	17190		24750	280861	K 51167	APG	wild(4)	Lablab purpureus subsp. NN	Kenya	Africa	East	134	green	brown	purple	green	purple	flat and long	3.46	1.54	3.54	1.26	6.9	5.284	6.6494	2.6	I	I	B
406	516	22733								Q-17430	CIAT	wild(4)	Lablab purpureus subsp. NN	unknown	unknown	unknown	106	-	brown	green	green	Not available	Not available	4	1.38	4.22	1.38	6.702	5.136	2.948	4.4	I	I	B
8	12	NI 418									Meise Botanic Garden	wild(4)	Lablab purpureus subsp. NN	Rwanda	Africa	Central	-	-	-	purple	green	Not available	Not available	Not available	Not available	Not available	Not available	Not available	Not available	Not available	Not available	I	I	C
38	76	APG 50433			76997					MM 561, AusTRCF 76997	APG	wild(2)	Lablab purpureus subsp. uncinatus	Zambia	Africa	South	98	green	brown	green	green	Not available	flat and long	3.1	1.78	3.18	1.72	8.33	6.316	3.298	2.2	I	I	D
46	87	APG 50422			58126			24796		AusTRCF 58126	APG	wild(2)	Lablab purpureus subsp. uncinatus	Zimbabwe	Africa	South	61	green	brown	purple	green	purple	flat and long	2.98	1.5	3.36	1.6	8.162	6.004	3.122	2	I	I	D
317	423	18633			52564	17195		18633		IBS 577	ILRI	wild(2)	Lablab purpureus subsp. uncinatus	Malawi	Africa	East	66	green	brown	green	green	Not available	flat and long	2.9	1.32	3.46	1.72	7.735	5.595	2.06	2.2	I	I	D
366	470	22654			51564	22654		21045			CIAT	wild(2)	Lablab purpureus subsp. uncinatus	Zambia	Africa	South	69	green	brown	green	green	purple	flat and long	3.08	1.66	3.32	1.88	7.854	5.822	2.574	2.2	I	I	D
73	117	APG 50428		VI058804	67639	17197		21082		AusTRCF 67639	APG	cultivated	Lablab purpureus subsp. purpureus	ex India	Asia	South	60	green	brown	purple	green	purple	flat and long	6.58	2.54	6.1	2.1	10.326	6.514	4.442	3	II	IV	G
97	145	APG 50379			52518					IBS 837, 4661, AusTRCF 52518	APG	cultivated	Lablab purpureus (L.) Sweet	India	Asia	South	107	-	-	green	green	purple	Not available	3.8	1.8	Not available	Not available	Not available	Not available	Not available	Not available	I	III	F
173	222	APG 50285			52518 seln B					AC No 4661, IBS 837, AusTRCF 318705	APG	cultivated	Lablab purpureus subsp. purpureus	India	Asia	South	115	green	brown	green	green	purple	flat and long	4.36	1.84	5.12	1.96	10.38	7.346	4.342	3.2	I	III	E
181	230	APG 50293								ENDURANCE, CQ 3642, line 142, AusTRCF 320372	APG	cultivated	Lablab purpureus subsp. purpureus	Guinea	Africa	West	113	green	brown	green	green	white	flat and long	3.44	1.4	4.62	1.62	8.788	6.388	3.89	3.4	III	IV	H
382	487	22694			52437	22694		21048			CIAT	wild(4)	Lablab purpureus subsp. NN	South Africa	Africa	South	112	green	brown	purple	green	purple	flat and long	Not available	Not available	3.6	1.22	6.148	4.464	3.176	4.6	I	II	H
218	294-2	13694		VI058793		22777		13694		PGRC 211414, ETH cultivated	ILRI	cultivated(2)	Lablab purpureus subsp. uncinatus	Ethiopia	Africa	East	79	-	brown	green	green	purple	Not available	4	2.5	4.45	2.525	13.62	10.13	6.72	1.5	I	I	I
220	297	13697								PGRC 211419	ILRI	cultivated(2)	Lablab purpureus subsp. uncinatus	Ethiopia	Africa	East	75	green	brown	purple	green	purple	not sure	3.7	2.26	4.62	2.22	Not available	Not available	Not available	2.2	I	I	I
417	528	22776				22776		13692		ETH cultivated	CIAT	cultivated(2)	Lablab purpureus subsp. uncinatus	Ethiopia	Africa	East	60	green	brown	green	green	purple	flat and long	3.2	2.2	4.46	2.36	Not available	Not available	Not available	1.6	I	I	I
339	441	17189			24973	17189		14550; 24749			CIAT	cultivated	Lablab purpureus subsp. purpureus	Zimbabwe	Africa	South	95	green	brown	green	green	Not available	flat and long	3.3	1.3	3.62	1.34	7.036	5.236	2.936	3	I	III	J
27	58	2009 TN 92									DR.TOMOOKA	cultivated	Lablab purpureus subsp. purpureus	India	Asia	South	105	green	brown	green	green	white	flat and long	5.54	2.04	4.82	1.92	10.28	7.416	5.102	3.6	III	IV	Not determined
47	88	APG 50391			52530					IBS 861, AusTRCF 52530	APG	cultivated	Lablab purpureus subsp. purpureus	India	Asia	South	90	green	brown	green	green	white	flat and long	4.82	2.12	4.74	1.92	11.156	6.924	4.296	3.4	II	IV	Not determined
56	98	APG 50439			96950	22722		24803		AusTRCF 96950	APG	cultivated	Lablab purpureus subsp. purpureus	Indonesia	Asia	Southeast	86	green	brown	green	green	purple	flat and long	5.22	1.8	5.62	1.9	10.854	8.22	4.48	4.4	II	IV	Not determined
58	100	APG 50469								TLN 12, AusTRCF 309489	APG	cultivated	Lablab purpureus subsp. purpureus	Nigeria	Africa	West	63	green	brown	green	green	white	flat and long	5.88	2.18	5.56	2	9.994	6.922	4.456	3.8	II	IV	Not determined
60	102	APG 50442			103820					AusTRCF 103820	APG	cultivated	Lablab purpureus subsp. purpureus	Sudan	Africa	East	107	green with purple outer	brown	purple	green	purple	flat and long	5.64	1.52	5.33333	1.5	10.425	8.635	5.17	3	II	IV	Not determined
63	106	APG 50468								TLN 11, AusTRCF 309488	APG	cultivated	Lablab purpureus subsp. purpureus	Nigeria	Africa	West	89	green	brown	green	green	white	flat and long	5.1	2.04	4.4	1.82	10.242	7.528	4.704	3	II	IV	Not determined
66	109	APG 50429			69498					AusTRCF 69498	APG	wild(2)	Lablab purpureus subsp. uncinatus	Zimbabwe	Africa	South	63	green	brown	purple	green	purple	flat and long	2.78	1.46	3.15	1.3	Not available	Not available	Not available	2	II	I	Not determined
72	116	APG 50381			52520					IBS 879, AusTRCF 52520	APG	cultivated	Lablab purpureus subsp. purpureus	India	Asia	South	-	green	brown	green	green	white	Not available	5.6	2.04	5.7	2	12.402	9.094	5.514	3	II	IV	Not determined
93	141	APG 50419			52957					AusTRCF 52957	APG	wild(2)	Lablab purpureus subsp. uncinatus	Zambia	Africa	South	65	green	brown	purple	green	purple	flat and long	3.04	1.66	3.18	1.66	8.836	6.616	3.196	2	I	I	Not determined
107	155	APG 50371			52444					IBS 569, AusTRCF 52444	APG	wild(4)	Lablab purpureus subsp. NN	Malawi	Africa	East	98	green	brown	green	green	purple	flat and long	4.1	1.74	3.78	1.48	7.388	6.126	3.224	3.2	I	I	Not determined
109	157	APG 50380			52519					IBS 878, AusTRCF 52519	APG	cultivated	Lablab purpureus subsp. purpureus	India	Asia	South	62	green	brown	green	green	white	flat and long	5.06	2.02	5.2	1.88	11.548	7.838	4.514	3.2	II	IV	Not determined
110	158	APG 50332						14413		AusTRCF 322332	APG	cultivated	Lablab purpureus subsp. purpureus	Ethiopia	Africa	East	98	green	brown	green	green	white	flat and long	4.9	2.16	5	2.12	12.268	8.176	4.784	2.8	III	IV	Not determined
111	159	APG 50370			52437					IBS 059, AusTRCF 52437	APG	wild(4)	Lablab purpureus subsp. NN	South Africa	Africa	South	62	-	brown	green	green	Not available	Not available	Not available	Not available	3.18	1.42	7.244	4.98	3.388	3.6	I	II	Not determined
113	161	APG 50367			51564					AusTRCF 51564	APG	wild(2)	Lablab purpureus subsp. uncinatus	Zambia	Africa	South	58	green	brown	purple	green	Not available	flat and long	2.74	1.56	3.08	1.68	8.924	6.656	3.54	2	I	I	Not determined
118	166	APG 50351			34777					IC 10190, AusTRCF 34777	APG	cultivated	Lablab purpureus subsp. purpureus	India	Asia	South	61	green	brown	green	green	white	flat and long	4.62	1.96	4.4	2	10.745	7.59	3.9	3	II	IV	Not determined
119	167	APG 50354			34780					IC 10483, AusTRCF 34780	APG	cultivated	Lablab purpureus subsp. purpureus	India	Asia	South	57	green	brown	purple	green	purple	flat and long	6.7	2.26	5.44	1.58	10.022	7.158	4.932	4.2	II	IV	Not determined
127	174	APG 50344							354918	13-36, AusTRCF 324390	APG	cultivated	Lablab purpureus subsp. purpureus	Israel	Asia	West	43	green	brown	green	green	white	flat and long	5.6	2	4.52	1.72	10.84	8.956	6.832	3.8	II	IV	Not determined
129	177	APG 50343							288466	38, AusTRCF 324389	APG	cultivated	Lablab purpureus subsp. purpureus	India	Asia	South	75	green	brown	green	green	white	flat and long	4.5	2.04	4.9	1.96	11.402	7.524	4.832	3.4	II	IV	Not determined
146	196	APG 50270			30701					DBP 7, AusTRCF 30701	APG	cultivated	Lablab purpureus subsp. purpureus	Myanmar	Asia	Southeast	-	-	-	Not available	Not available	Not available	Not available	Not available	Not available	Not available	Not available	Not available	Not available	Not available	Not available	II	IV	Not determined
149	199-2	APG 50315						14447		AusTRCF 322315	APG	cultivated	Lablab purpureus subsp. purpureus	Ethiopia	Africa	East	89	green	brown	green	green	white	flat and long	3.92	1.84	4.72	1.74	11.7	7.872	4.778	3	II	IV	Not determined
162	209-2	APG 50322						14424		AusTRCF 322322	APG	cultivated	Lablab purpureus subsp. purpureus	Ethiopia	Africa	East	127	-	-	green	green	white	Not available	3.86	1.24	Not available	Not available	Not available	Not available	Not available	Not available	II	IV	Not determined
166	213	APG 50273							639277	Grif 969, AusTRCF 309569	APG	cultivated	Lablab purpureus subsp. purpureus	China	Asia	East	46	purple	brown	purple	green	purple	round, short	5.84	1.34	6.12	1.38	10.404	8.758	5.106	4.2	II	IV	Not determined
168	216	APG 50274								Brennans poor man bean, SSN# 1722, AusTRCF 309737	APG	cultivated	Lablab purpureus subsp. purpureus	Australia	Australia	Australia	112	green	brown	green	green	purple	flat and long	8.7	2.82	10.1	2.6	11.554	8.004	5.402	6	II	IV	Not determined
176	225	APG 50261			24973	17189		14550; 24749			APG	wild(4)	Lablab purpureus subsp. NN	Zimbabwe	Africa	South	145	green	brown	purple	green	Not available	round, short	3.46667	1	3.63333	1.2	5.4025	4.2625	2.45	4	I	II	Not determined
186	236	APG 50276								Mozsnys poor mans bean, SSN# 1782, AusTRCF 317962	APG	cultivated	Lablab purpureus subsp. purpureus	Australia	Australia	Australia	112	green	brown	green	green	purple	Not available	8.94	2.84	10.16	2.84	11.918	8.264	5.46	5.4	II	IV	Not determined
199	253	6536				22771		6536		A 51268	ILRI	cultivated	Lablab purpureus subsp. purpureus	ex Ethiopia	Africa	East	110	green	brown	green	green	white	flat and long	4.76	2.08	4.46	2	11.204	8.04	4.924	3.6	III	IV	Not determined
207	269	11610				22730				N 82499, Q 5427, AusTRCF 320837	ILRI	cultivated	Lablab purpureus subsp. purpureus	unknown	unknown	unknown	64	green	brown	green	green	purple	round and long	6.96	1.54	6.84	1.28	10.276	7.206	5.748	4.6	II	IV	Not determined
217	294-1	13694		VI058793		22777		13694		PGRC 211414, ETH cultivated	ILRI	cultivated(2)	Lablab purpureus subsp. uncinatus	Ethiopia	Africa	East	82	-	brown	purple	green	purple	Not available	4.9	2.38	5.68	2.54	14.164	10.298	6.438	2.2	I	I	Not determined
222	299	13700		VI058767		22779		13700		PGRC 211423	ILRI	cultivated	Lablab purpureus subsp. purpureus	Ethiopia	Africa	East	150	-	brown	purple	green	purple	Not available	7.76	2.24	7.28	2.46	12.808	8.514	4.246	3.4	II	IV	Not determined
224	303	13704						13704		PGRC 211556, ETH cultivated	ILRI	cultivated(2)	Lablab purpureus subsp. uncinatus	Ethiopia	Africa	East	70	green	brown	green	green	purple	Not available	4.74	2.52	4.12	2.14	Not available	Not available	Not available	2	I	I	Not determined
235	317-1	14425								K 58164D	ILRI	cultivated	Lablab purpureus subsp. purpureus	unknown	unknown	unknown	110	green	brown	green	green	white	flat and long	4.86	2.2	5.48	2	10.4	7.5125	4.1875	4	III	IV	Not determined
236	321	14429						14429		K 77307F, origin KEN?	ILRI	cultivated	Lablab purpureus subsp. purpureus	ex Australia	Australia	Australia	95	green	brown	green	green	purple	flat and long	3.42	1.92	4.64	1.98	11.594	8.21	4.706	2.8	III	IV	Not determined
246	336-2	14445								K 77301I	ILRI	cultivated	Lablab purpureus subsp. purpureus	unknown	unknown	unknown	105	green	brown	green	green	white	flat and long	5.5	2.2	Not available	Not available	11.45	8.126	5.132	Not available	II	IV	Not determined
254	344-1	14454								K 5420841A	ILRI	cultivated	Lablab purpureus subsp. purpureus	unknown	unknown	unknown	114	green	brown	green	green	white	flat and long	5.48	2.14	5.2	1.98	11.34	7.932	5.19	3.6	III	IV	Not determined
277	385-1	14896					TLN-1	14896		Bangalore-1	ILRI	cultivated	Lablab purpureus subsp. purpureus	India	Asia	South	-	green	brown	green	green	white	flat and long	Not available	Not available	6.44	2.08	10.678	7.846	5.638	3.4	II	IV	Not determined
280	387	14902					TLn 11			US67-25, AusTRCF 309488	ILRI	cultivated	Lablab purpureus subsp. purpureus	India	Asia	South	78	green	brown	green	green	white	flat and long	7.12	1.68	7	1.64	10.724	8.21	4.842	3.4	II	IV	Not determined
288	391-2	14906					TLN-15	14906		US67-33, 67-25	ILRI	cultivated	Lablab purpureus subsp. purpureus	India	Asia	South	62	green	brown	green	green	white	flat and long	5.22	1.96	5.62	1.52	9.906	7.78	5.12	4.6	II	IV	Not determined
297	401	18605						18605	195851	n/a	ILRI	cultivated	Lablab purpureus subsp. purpureus	Egypt	Africa	North	150	-	-	green	green	Not available	Not available	5.1	2	5.04	1.96	11.27	7.894	4.254	2.4	II	IV	Not determined
301	405	18612						18612	338341	rather small seed, but tan, n/a	ILRI	cultivated	Lablab purpureus subsp. purpureus	Zambia	Africa	South	87	green	brown	green	green	white	flat and long	4.6	2.08	4.1	1.82	9.16	6.354	4.014	3.6	II	IV	Not determined
303	408	18616							345609		ILRI	cultivated	Lablab purpureus subsp. purpureus	Australia	Australia	Australia	114	green	brown	green	green	purple	ambigious	5.78	2.2	5.36	2.1	9.484	7.814	4.626	3.2	II	IV	Not determined
306	412	18621						18621	392369	Col no. 1941	ILRI	cultivated	Lablab purpureus subsp. purpureus	Former Soviet Union	Europe	Europe	50	green	brown	green	green	purple	flat and long	5.12	1.58	5.5	2.08	12.086	8.632	5.274	3	II	IV	Not determined
322	427	18637				22183		18637			ILRI	cultivated	Lablab purpureus subsp. purpureus	Colombia	America	South	102	green	brown	green	green	white	flat and long	5.4	2.26	5.16	2.04	11.334	7.678	4.816	4	III	IV	Not determined
327	431-2	18595					TLN-9	18595		DL-2542	ILRI	cultivated	Lablab purpureus subsp. purpureus	India	Asia	South	68	green	brown	green	green	white	flat and long	6.1	1.94	5.98	2.18	10.246	7.372	4.84	4.2	II	IV	Not determined
328	432-1	18596					TLn 16			US 67-29	ILRI	cultivated	Lablab purpureus subsp. purpureus	India	Asia	South	54	-	-	Not available	Not available	Not available	Not available	5.14	1.94	5.56	1.92	10.72	8.002	4.832	3.8	II	IV	Not determined
329	432-2	18596					TLn 16			US 67-29	ILRI	cultivated	Lablab purpureus subsp. purpureus	India	Asia	South	74	green	brown	green	green	white	flat and long	5.88	2	Not available	Not available	Not available	Not available	Not available	Not available	II	IV	Not determined
330	432-3	18596					TLn 16			US 67-29	ILRI	cultivated	Lablab purpureus subsp. purpureus	India	Asia	South	-	green	brown	green	green	white	flat and long	5.5	2.7	5.66	1.96	10.51	7.234	4.798	4	II	IV	Not determined
333	435-1	18599					TLN-21	18599		Red type, US 67-33	ILRI	cultivated	Lablab purpureus subsp. purpureus	India	Asia	South	84	green	brown	green	green	purple	flat and long	4.98	1.98	4.8	1.92	9.522	6.914	8.1896	3.8	II	IV	Not determined
340	442	17190			28701	17190		24750	280861	K 51167	CIAT	wild(4)	Lablab purpureus subsp. NN	Kenya	Africa	East	143	-	-	green	green	Not available	Not available	3.3	1.3	Not available	Not available	Not available	Not available	Not available	4	I	I	Not determined
341	443	17194			52511	17194		24779		IBS-154, M-782	CIAT	wild(4)	Lablab purpureus subsp. NN	Zimbabwe	Africa	South	69	green	brown	green	green	Not available	flat and long	3.9	1.24	3.48	1.22	6.938	5.162	3.59	3.4	I	II	Not determined
344	446	18373								026/027-08	CIAT	cultivated	Lablab purpureus (L.) Sweet	Colombia	America	South	145	-	-	green	green	Not available	Not available	5.32	2.28	Not available	Not available	Not available	Not available	Not available	Not available	II	IV	Not determined
345	447	21542								NI-299	CIAT	cultivated	Lablab purpureus subsp. purpureus	unknown	unknown	unknown	132	-	brown	green	green	purple	Not available	7.82	2.36	9.35	2.35	12.358	8.164	4.638	5	II	IV	Not determined
354	457	22600			52514	22600		24781			CIAT	cultivated	Lablab purpureus subsp. purpureus	Zambia	Africa	South	62	green	brown	green	green	white	flat and long	5.96	2.08	4.96	1.82	9.308	6.746	4.052	4	II	IV	Not determined
357	461	22604		VI058786	52535	22604		21061			CIAT	cultivated	Lablab purpureus subsp. purpureus	ex India	Asia	South	86	green	brown	green	green	white	flat and long	Not available	Not available	4.8	1.92	12.104	7.88	4.272	2.8	II	IV	Not determined
358	463-1	22608	50432	VI055315	76996	22608		21084		AusTRCF 76996, MM 520	CIAT	cultivated	Lablab purpureus subsp. purpureus	Zambia	Africa	South	107	green	brown	green	green	purple	flat and long	4.88	2.24	5.04	1.78	12.104	8.488	5.514	3.8	II	IV	Not determined
359	463-2	22608	50432	VI055315	76996	22608		21084		AusTRCF 76996, MM 520	CIAT	cultivated	Lablab purpureus subsp. purpureus	Zambia	Africa	South	108	green	brown	green	green	white	flat and long	4.54	2.02	4.48	1.78	10.266	7.336	5.202	3.8	II	IV	Not determined
396	506	22759								L-9-87	CIAT	cultivated	Lablab purpureus subsp. purpureus	unknown	unknown	unknown	84	green	brown	green	green	purple	flat and long	5	2.1	5	2.02	12.242	8.312	4.862	3.2	III	IV	Not determined
449	560	VI 047240								MAK PEP	AVRDC	cultivated	Lablab purpureus subsp. purpureus	Lao	Asia	Southeast	150	green	-	green	green	purple	flat and long	8.75	2.75	7.96	2.34	14.288	10.226	5.19	3.2	II	IV	Not determined
452	563	VI 047742								SHIM (SITAKUNDU TYPE)	AVRDC	cultivated	Lablab purpureus (L.) Sweet	Bangladesh	Asia	South	-	-	-	green	green	Not available	Not available	Not available	Not available	Not available	Not available	Not available	Not available	Not available	Not available	II	IV	Not determined
458	569	VI 048353								DAU VAN DO	AVRDC	cultivated	Lablab purpureus subsp. purpureus	Viet Nam	Asia	Southeast	107	green with purple outer	-	purple	green	purple	flat and long	7.14	1.52	6.7	1.48	11.496	8.798	6.31	3.8	II	IV	Not determined
471	582	VI 055603								THUA PAEH	AVRDC	cultivated	Lablab purpureus subsp. purpureus	Lao	Asia	Southeast	98	green	brown	green	green	purple	flat and long	7.06	2.02	7.1	1.9	12.076	9.008	5.652	3.8	III	IV	Not determined
484	596	VI 056687									AVRDC	cultivated	Lablab purpureus subsp. purpureus	Bangladesh	Asia	South	81	green with purple outer	-	purple	green	purple	flat and long	8.44	2.76	Not available	Not available	Not available	Not available	Not available	Not available	II	IV	Not determined
486	598	VI 056695									AVRDC	cultivated	Lablab purpureus subsp. bengalensis	Bangladesh	Asia	South	130	green	-	green	green	white	round and long	11.9	1.04	6.58	0.86	Not available	Not available	Not available	3.2	II	IV	Not determined
487	599	VI 056699									AVRDC	cultivated	Lablab purpureus subsp. bengalensis	Bangladesh	Asia	South	113	green	-	green	green	white	round and long	12.32	1.08	8.2	0.92	12.49	5.88	4.14	3	II	IV	Not determined
