# Supplementary material for: Molecular Analysis of Genetic Diversity and Structure of the Lablab (Lablab purpureus (L.) Sweet) Gene Pool Reveals Two Independent Routes of Domestication
Source: Plants (Basel). 2022 Dec 22;12(1):57. doi: 10.3390/plants12010057 (PMC9824144; doi:10.3390/plants12010057)
Supplement: Supplementary file 1 [file plants-12-00057-s001.zip › Table S2.xlsx]

## Sheet: Supplementary Table S2
Table S2. A list of nuclear and chloroplast SSR markers used in this study.
Marker name	Forward	Reverse	Reference
Nuclear SSR markers
Hbp_001	GACAACGACAGGGATAA	GAGTAAGAAGGGAAGTGA	Zhang et al. 2013
Hbp_002	TTCCGCAAAGACAAGTT	CGTCAGCGAGAAGGGTA	Zhang et al. 2013
Hbp_003	CCAAATCCGAATCAGCA	CTAAGCAGGAAAGCAAA	Zhang et al. 2013
Hbp_006	GGTTCTCCTGCTGTTTG	CCATCTTGCTGCCCTCA	Zhang et al. 2013
Hbp_009	GCCCAGCTAAGATTGAG	GTTCTGATCCTATGACCG	Zhang et al. 2013
Hbp_010	AGCCTGACATTTCACCTG	TGCCACTTCAATCTCCC	Zhang et al. 2013
Hbp_011	GATGACCCTCCTACAG	GAGTTAACATAAATAAAGCT	Zhang et al. 2013
Hbp_012	CCAAATCCGAATCAGCAG	TCCCTACCAAACACCGT	Zhang et al. 2013
Hbp_013	CTCTACTATCATCCGTCTC	TCGGTCCATACTCTTCT	Zhang et al. 2013
Hbp_015	TTCTGGGCATTTCTCGG	GTAGTGGAAGGGTGGGT	Zhang et al. 2013
Hbp_016	ATTCGGGTTCGTGTTGG	CGATTGCTGTGGTGGTT	Zhang et al. 2013
c17963_g1_i1	TGATGAGGAGGAGTGTGATAG	GATCTAGAGATGCAGAGGAGAG	Robotham and Chapman 2015
c21512_g2_i1	GCCAAGTTTCTACGACCTC	GAGATCGACCTGGAAATACTC	Robotham and Chapman 2015
c22788_g1_i1	GCCTGTTCAACATCATGTATC	TGTCAAATCATTAGCCAACTT	Robotham and Chapman 2015
c23309_g1_i1	CAAAGCAACATTAACTAAACCA	AGGGATAGGTGAAATGAGAAG	Robotham and Chapman 2015
c13119_g1_i1	TGATAAGTTGCTGAAACATCC	ACTGATCCTTCTCTCCTTCAC	Robotham and Chapman 2015
c13353_g1_i1	GAAGCTTCACAAGTGAAAGAA	GTTCTCGTTCTGAACAATCAT	Robotham and Chapman 2015
KTD184	TCATTTCCAAGCTTCTGTAGTC	GAGTCGAAGAGTATGGAGAGAA	Keerthi et al.2018
KTD225	GTCTTTCACCATTTCTTCCTC	GTGTACACAGACACACACGATAC	Keerthi et al.2018
KTD241	GTTAAGCCTTGAGATCTGACAC	CTTCACCTCACTCACAACATT	Keerthi et al.2018
KTD245	AAGGAGAGAGTTAAGGTTGTAGAG	AAAAGTGCCACATTCTCTCTC	Keerthi et al.2018
KTD249	ACTACCCTATAGTCTCTCTGTGCT	AGAAGATGATCTCAGATTCCAC	Keerthi et al.2018
CEDG024	CATCTTCCTCACCTGCATTC	TTTGGTGAAGATGACAGCCC	Wang et al.2004
CEDG030	TGAGGGAATGGGAGAGAGGC	TCCGCAGATAGAGGCTCACG	Wang et al.2004
CEDG044	TCAGCAACCTTGCATTGCAG	TTTCCCGTCACTCTTCTAGG	Wang et al.2004
DMB228	TGCAGAAAACAACAACAGCA	AATAAGTGGTGCCAAATTGTCC	Somta et al.2009
VES1177	GAGCTAGTTGGTGGGGAACA	TGCCTGAATGTGTGGTTCAT	Chankaew et al.2014
Chloroplast SSR markers
VgcpSSR1	GGTGGATGTTTATACCCAATCG	TCTTTCTGCGATACAAACAAGAA	Pan et al. 2014
VgcpSSR2	TTTTCTATGTATGGCGCAACC	CGGGGATAAAGCTGCCTATT	Pan et al. 2014
VgcpSSR3	AAACCACTCGAATATTATGGAAA	CCAGTTCAAATCTGGTTCCTG	Pan et al. 2014
VgcpSSR4	GAAAAGAACAAGCAAATCCACA	TGATCCTTACGATGCTTCCTTT	Pan et al. 2014
VgcpSSR5	AGCCCACTTTTCCGTAGGTT	CTTTTCCTTGCCATAATGGTT	Pan et al. 2014
VgcpSSR7	TCAACCATTTCCCAACACCT	CATCGAGTTCATGGATTTGC	Pan et al. 2014
VgcpSSR9	TGAAATTTGAAAAACGGGGTA	AAGCGATACGGATAGATTCCT	Pan et al. 2014
VgcpSSR10	GGGCTCATTGGCTGTAGAAA	CCATCTCTCCCCAATTGAAA	Pan et al. 2014
VgcpSSR11	TTTGAGAAGGTTCAATTGTTCG	TCGGACTCTAGGAAAGGACAA	Pan et al. 2014
VgcpSSR12	GGCCATTTATCCCACTTTCC	CCAGTCTCTACTGGGGGTTA	Pan et al. 2014
VgcpSSR13	TATTGGTTTTGCACCAATCG	ACCAGGGTGTATGTGCGACT	Pan et al. 2014
VgcpSSR14	TGGATCATAATCCTTGAACATCA	TGCGAAAACAAAGATAAGAAATCA	Pan et al. 2014
